1 **Rediscovery and redescription of the endangered *Hypostomus subcarinatus* Castelnau, 1855**  
2 **(Siluriformes: Loricariidae) from the rio São Francisco basin in Brazil, with comments on the**  
3 **urban water conservation**

4

5

6

7 Cláudio Henrique Zawadzki<sup>1\*</sup>, Iago de Souza Penido<sup>2</sup>, Tiago Casarim Pessali<sup>3</sup>

8

9 <sup>1</sup> Universidade Estadual de Maringá. Departamento de Biologia. Núcleo de Pesquisas em Limnologia,

10 Ictiologia e Aquicultura (Nupélia), Av. Colombo, 5790, 87020–900 Maringá, Paraná, Brazil. E-mail:

11 [chzawadzki@hotmail.com](mailto:chzawadzki@hotmail.com)

12 <sup>2</sup> Programa de Pós-Graduação em Biologia Comparada. Universidade Estadual de Maringá, Av.

13 Colombo, 5790, 87020–900 Maringá, Paraná, Brazil.

14 <sup>3</sup> Museu de Ciências Naturais, PUC Minas, Av. Dom José Gaspar 290, 30535–610, Belo Horizonte,

15 Minas Gerais, Brazil.

16

17 \*Corresponding author

18 E-mail: [chzawadzki@hotmail.com](mailto:chzawadzki@hotmail.com)

19

20

21

22

23

24

25

26

27

28

29

30

31

32

33

## 34 **Abstract**

35 *Hypostomus subcarinatus* Castelnau, 1855 is rediscovered in the Pampulha lake, an urban lake pertaining  
36 to the rio das Velhas basin in the rio São Francisco system in the state of Minas Gerais, southeastern  
37 Brazil. Herein, *H. subcarinatus* is redescribed and its diagnosis from the congeners is established due to  
38 characters such as blue tan dorsal fin in live specimens, slender bicuspid teeth, dentaries angled more than  
39 90 degrees, moderate keels along lateral series of plates, small roundish dark spots, one plate bordering  
40 supraoccipital, by having nuptial odontodes mainly on pectoral, dorsal and caudal-fin rays, and longer  
41 anal-fin unbranched ray. The rediscovery of *H. subcarinatus* after more than 160 years after its original  
42 description was one unexpected event, because the Pampulha lake is an artificial, shallow and polluted  
43 urban lake. The lake is located in the downtown of municipality of Belo Horizonte, the third largest urban  
44 agglomeration in Brazil with a population exceeding 5.9 million inhabitants. In the light of this finding  
45 we address the importance of urban body waters to maintenance of fish biodiversity in the neotropics.

46

## 47 **Introduction**

48 The loricariid *Hypostomus subcarinatus* was described by Castelnau [1] from a vague type locality stated  
49 as “des rivièrre de la province des Mines” [streams from the state of Minas Gerais]. Therefore, it was  
50 hypothetically asserted to the Eastern Brazilian coastal drainage and to the rio São Francisco basin [2].  
51 However, despite some ichthyological survey efforts in these systems [3,4], none scientifically record of  
52 *H. subcarinatus* was undoubtedly stated for more than 160 years. This historical *H. subcarinatus* lack of  
53 records lead to some hypothesis, a) an erroneous locality designation in the original description by  
54 Castelnau; b) species rarity or endemism to specific locations; c) several ongoing populational  
55 extinction processes; or d) imprecise identifications.

56 In 2014 it was accomplished a fish environmental monitoring of the Pampulha lake, an artificial shallow  
57 and polluted urban lake pertaining to the rio São Francisco basin system and located in the downtown of  
58 municipality of Belo Horizonte, Minas Gerais State, southeastern Brazil. Unexpectedly, in the Pampulha  
59 lake seven large specimens of the catfish *Hypostomus* were captured. Subsequent specimens examination  
60 did not allow to recognize them to any of the commonly found species of *Hypostomus* from the rio São  
61 Francisco basin. However, in comparison to *Hypostomus* original descriptions, as well as to types series  
62 of *Hypostomus* from worldwide scientific fish museums we finally recognized the specimens as the  
63 Castelnau’s (1855) “lost” *Hypostomus subcarinatus*. In this work we redescribe the species and discuss  
64 about the importance of the conservation of urban water body.

65

## 66 **Material and Methods**

67 Fishes were collected under permits from the Instituto Chico Mendes de Conservação da Biodiversidade  
68 – ICMBio n. 9101-1/2017. Captured individuals were anaesthetized and sacrificed by immersion in  
69 eugenol (active ingredient: phenolic eugenol, 4-Allyl-2-methoxyphenol-C<sub>10</sub>H<sub>12</sub>O<sub>2</sub>, derived from stems,  
70 flowers and leaves of *Eugenia caryophyllata* and *Eugenia aromatica* trees) [5], fixed in 10% formalin  
71 solution and later preserved in 70% ethanol. These procedures are in accordance to the ‘Ethical Principles  
72 in Animal Research’ guidelines adopted by the Brazilian College of Animal Experimentation (COBEA).  
73 Measurements and counts of bilaterally symmetrical features were taken from the left side of the body,  
74 whenever possible. Measurements were taken using a digital caliper to the nearest 0.1 mm. Methodology  
75 and terminology of measurements follows Boeseman [6], modified by Weber [7] and Zawadzki *et al.* [8].  
76 Plate counts and bone nomenclature follow Schaefer [9], modified by Oyakawa *et al.* [10]. Standard  
77 length (SL) is expressed in millimeters and all other measurements are expressed as percents of standard  
78 length or head length (HL), unless otherwise noted. Institutional abbreviations of material deposited  
79 follow Fricke & Eschmeyer [11]. The species conservation status was calculated through the criteria by  
80 the International Union for Conservation of Nature (IUCN standards and petitions subcommittees, 2017  
81 [12]) guideline. The Extent of Occurrence (EOO) was calculated by the minimum convex polygon  
82 method, using the software Google Earth Pro.

83

## 84 **Results**

85 *Hypostomus subcarinatus*, Castelnau, 1855

86 (Figs. 1, 2 and 3, Table 1)

87

88 **Type-specimens.** Holotype. MNHN A. 9575, 241.8 mm SL, des rivières de la province des Mines  
89 [streams from the state of Minas Gerais].

90 **Material analyzed.** All from Brazil, Minas Gerais State: rio São Francisco basin: MCNIP 1103, 7, 158.1–  
91 249 mm SL, municipality of Belo Horizonte, Pampulha lake, tributary of córrego da Onça, rio das Velhas  
92 basin, 19°50'30"S 43°59'38"W, 30 Jan 2014, A. A. Weber & D. Gontijo. NUP 20229, 7, 164.9–248.9  
93 mm SL, municipality of Belo Horizonte, Pampulha lake, tributary of córrego da Onça, rio das Velhas  
94 basin, 19°50'30"S 43°59'38"W, 23 Dec 2017, I. S. Penido & T. C. Pessali. MCNIP 1761, 7, 191.1–308.8  
95 mm SL, municipality of Belo Horizonte, Pampulha Lake, tributary of córrego da Onça, rio das Velhas

96 basin, 19°50'30"S 43°59'38"W, 15 Apr 2016, I. S. Penido, C.H. Zawadzki, F. M. Azevedo & T. C.  
 97 Pessali.  
 98 Table 1. Morphometrics and counts of *Hypostomus subcarinatus*. N = 24 specimens (range not including  
 99 holotype). SD = Standard deviation.

|                                                   | holotype | range       | mean  | SD   |
|---------------------------------------------------|----------|-------------|-------|------|
| Standard length (mm)                              | 241.08   | 158.1–308.9 | 215.5 | 38.4 |
| <b>Percents of SL</b>                             |          |             |       |      |
| Predorsal length                                  | 35.7     | 33.8–37     | 35.4  | 1.0  |
| Head length                                       | 29.1     | 26.9–29.7   | 28.2  | 0.8  |
| Cleithral width                                   | 25.6     | 23.4–26.6   | 24.8  | 0.8  |
| Head depth                                        | 15.8     | 15.4–17.8   | 17.1  | 0.5  |
| Interdorsal distance                              | 23.7     | 20.3–23.6   | 22.3  | 0.9  |
| Caudal peduncle length                            | 34.9     | 31.8–36     | 34.4  | 1.1  |
| Caudal peduncle depth                             | 8.3      | 7.1–8.4     | 7.7   | 0.3  |
| Dorsal-spine length                               | 30.4     | 22.7–33.1   | 27.8  | 2.7  |
| Thoracic length                                   | 23       | 20.7–24.4   | 22.8  | 1.0  |
| <b>Percents of head length</b>                    |          |             |       |      |
| Cleithral width                                   | 87.9     | 84.6–92.7   | 87.7  | 2.4  |
| Head depth                                        | 54.4     | 57.5–63.2   | 60.5  | 1.6  |
| Snout length                                      | 60.3     | 57.4–62.4   | 59.8  | 1.4  |
| Orbital diameter                                  | 11.8     | 11.1–13.7   | 12.5  | 0.7  |
| Interorbital width                                | 38.5     | 33.1–39.4   | 37.1  | 1.6  |
| Mandibular width                                  | 15.7     | 12.4–14.7   | 13.8  | 0.7  |
| <b>Other percents</b>                             |          |             |       |      |
| Orbital diameter in snout length                  | 19.6     | 17.8–23.9   | 20.9  | 1.6  |
| Orbital diameter in interorbital length           | 30.7     | 29.5–38.4   | 22.7  | 2.9  |
| Mandibular length in interorbital length          | 40.7     | 31.4–43.8   | 37.2  | 2.6  |
| Dorsal-spine length in predorsal length           | 85.1     | 66.3–93.5   | 79.1  | 7.3  |
| First pectoral-fin ray length in predorsal length | 75.8     | 70.4–79.5   | 73.8  | 2.8  |
| Ventral caudal-fin ray length in predorsal length | 88.4     | 91.6–108.3  | 97.4  | 4.6  |
| Adipose-fin length in caudal peduncle depth       | 85.5     | 72.–106.6   | 87.9  | 10.8 |
| Caudal peduncle depth in caudal peduncle length   | 23.8     | 20.4–25     | 22.5  | 1.4  |
| Mandibular width in cleithral width               | 17.8     | 13.3–17.1   | 15.7  | 0.9  |
| Interdorsal length in dorsal-fin base             | 98.3     | 82.6–99.1   | 91.9  | 4.2  |
| Lower lip length in lower lip width               | 33.1     | 22.2–34.5   | 27    | 3.3  |
| <b>Counts</b>                                     |          |             |       |      |
| Median plates series                              | 28       | 28–32       | 30    |      |
| Plates bordering supraoccipital                   | 1        | 1–1         | 1     |      |
| Predorsal plates                                  | 3        | 3–3         | 3     |      |
| Dorsal plates below dorsal fin bases              | 8        | 8–8         | 8     |      |
| Plates between dorsal and adipose fins            | 9        | 7–9         | 8     |      |
| Plates between adipose and caudal fins            | 6        | 6–7         | 6     |      |
| Plates between anal and caudal fins               | 14       | 14–16       | 15    |      |
| Premaxillary teeth                                | 34       | 37–53       | 43    |      |
| Dentary teeth                                     | 34       | 36–54       | 44    |      |

101 **Diagnosis.** *Hypostomus subcarinatus* is distinguished from all congeners by having blue tan dorsal fin in  
102 living specimens (vs. not having blue tan dorsal fin). Additionally, *H. subcarinatus* is diagnosed from the  
103 species of the *H. cochliodon* group by having slender viliform bicuspid teeth (vs. robust spoon-shaped  
104 teeth) and by having dentaries angled to each other more than 90 degrees (vs. dentaries angled from 80 to  
105 90 degrees); from the remaining congeners except *H. affinis*, *H. ancistroides*, *H. argus*, *H. aspilogaster*,  
106 *H. borellii*, *H. boulengeri*, *H. carinatus*, *H. careopinnatus*, *H. commersoni*, *H. corantijni*, *H. crassicauda*,  
107 *H. delimai*, *H. dlouhyi*, *H. faveolus*, *H. formosae*, *H. gymnorhynchus*, *H. hemiurus*, *H. hoplonites*, *H.*  
108 *interruptus*, *H. micromaculatus*, *H. niceforoi*, *H. nigrolineatus*, *H. pantherinus*, *H. paucimaculatus*, *H.*  
109 *piratatu*, *H. plecostomus*, *H. punctatus*, *H. pusarum*, *H. rhantos*, *H. scabriceps*, *H. seminudus*, *H.*  
110 *tapijara*, *H. velhochico* and *H. watwata*, by having moderate keels along the five lateral series of plates  
111 (vs. lacking keels); from *H. affinis*, *H. ancistroides*, *H. argos*, *H. aspilogaster*, *H. borellii*, *H. boulengeri*,  
112 *H. carinatus*, *H. careopinnatus*, *H. commersoni*, *H. corantijni*, *H. crassicauda*, *H. delimai*, *H. dlouhyi*, *H.*  
113 *faveolus*, *H. formosae*, *H. gymnorhynchus*, *H. hemiurus*, *H. hoplonites*, *H. interruptus*, *H.*  
114 *micromaculatus*, *H. niceforoi*, *H. nigrolineatus*, *H. pantherinus*, *H. paucimaculatus*, *H. piratatu*, *H.*  
115 *plecostomus*, *H. punctatus*, *H. pusarum*, *H. rhantos*, *H. scabriceps*, *H. seminudus*, *H. tapijara*, *H.*  
116 *velhochico* and *H. watwata* by having more elongate and slender body, having a longer anal-fin  
117 unbranched ray, anal-fin unbranched ray length almost or equal to nostril length, that is, the distance from  
118 anterior margin of snout to anterior edge of eye (vs. shorter anal-fin unbranched ray, its length equal to  
119 nare length, that is, the distance from the anterior margin of nostril to nare).

120

121 Figure 1. *Hypostomus subcarinatus*, MNHN A, 9575, 241.8 mm SL, holotype, Brazil, Province de Mines  
122 [estado de Minas Gerais].

123

124 Figure 2. *Hypostomus subcarinatus* MCNIP 1103, 249.5 mm SL. Pampulha lake, Belo Horizonte, Minas  
125 Gerais State, Brazil.

126

127 **Description.** Morphometric data in Table 1. Overall view of body in Figs. 1, 2 and 3. Head moderately  
128 depressed and slightly compressed. Snout and anterior profile of head slightly pointed in dorsal view. Eye  
129 of small size, dorsolaterally positioned. Dorsal margin of orbit not raised. Greatest body width at  
130 cleithrum, narrowing from dorsal-fin region to caudal-fin origin. Dorsal profile of head convex from  
131 snout tip to vertical through interorbital region, forming angle of about 40° with ventral region of head;  
132 slightly convex from that point to dorsal-fin origin; straight from that point to caudal peduncle end; rising  
133 to procurent rays of dorsal fin. Ventral profile almost straight from snout tip to insertion of pelvic-fin

134 unbranched ray; tapering slightly straight from pelvic-fin insertion to first ventral caudal-fin procurrent  
135 ray. Anterior portion of caudal peduncle rounded with its dorsal surface compressed; posterior portion  
136 ellipsoid. Mesethmoid forming weak longitudinal bulge from snout tip to nares. Supraoccipital bone with  
137 slightly-developed median ridge and short posterior process bordered by single plate. Weak bulge  
138 originating lateral to nares, passing through supraorbital, and extending as ridge along dorsal portion of  
139 pterotic-supracleithrum. Opercle large, its horizontal length equal to distance between nares, with thin  
140 skin layer surrounding its ventral edges to subocular cheek plates. Oral disk round, moderate in size; its  
141 margins smooth. Lower lip far from reach transverse line through gill openings; ventral surface with two  
142 to three transverse dermal flaps posteriorly margining each dentary rami; short naked area followed by  
143 larger area with numerous small papillae decreasing in size distally. Maxillary barbel moderately long,  
144 slightly larger than eye to nare distance; mostly free from lower lip. Odontodes present on anterior surface  
145 of upper lip, just below snout. Dentaries moderate to strongly angled, averaging from 90° a 100° between  
146 left and right dentary rami. Teeth viliform, bicuspid with lateral cusp smaller than mesial cusp; crowns  
147 bent ventrally. Internally to mouth, transversal areas of short papillae bordering each premaxillary and  
148 dentary teeth rami. Median buccal papilla present and well developed.

149 Body covered with five rows of dermal plates with moderately-developed odontodes, except on base of  
150 dorsal fin and small naked area on snout tip. Predorsal region with very slight median keel. Dorsal, mid-  
151 dorsal, mid-ventral, and ventral series of plates with moderate keels. Median series with weakly  
152 developed keels; bearing continuous lateral line. Ventral series bent ventrally. Ventral surface of head  
153 covered with platelets, except for region beneath lower lip. Abdomen covered with minute platelets in  
154 specimens larger than 90 mm SL, with exception of very small areas around pectoral- and pelvic-fin  
155 insertions. Distal portion of pterygiophore exposed.

156 Dorsal fin II,7, its origin at vertical just posterior midpoint between pectoral- and pelvic-fin insertions;  
157 first spine present as V-shaped spinelet. Distal margin of dorsal fin slightly convex; tip of last dorsal-fin  
158 ray from two to three plates to reach adipose-fin spine. Adipose-fin spine compressed and slightly curved  
159 inward. Pectoral fin I,6, its distal border straight. Pectoral-fin spine slightly curved inward, covered with  
160 moderately developed odontodes. Odontodes curved inward, more developed along distal portions of  
161 spine, particularly in larger specimens; emerging from swollen papillae. Tip of adressed pectoral fin  
162 reaching to basal one-fourth to one-fifth of adressed pelvic-fin unbranched ray. Pelvic fin i,5, its distal  
163 border straight to slightly convex; its adressed unbranched ray surpassing one to two plates anal-fin  
164 origin. Anal fin i,4, its tip reaching to seventh plate after its origin; its distal margin straight. Caudal fin  
165 i,14,i, its margin falcate, with ventral lobe longer than dorsal.

166

167 Figure 3. The Castelnau's (1855) drawing of *Hypostomus subcarinatus*, MNHN A 9575, 241.8 mm SL,  
168 holotype, Brazil, Province de Mines [state of Minas Gerais], is depicted in the upper picture and  
169 compared to two live specimens photographed immediately after capture: MCNIP 1761, middle picture  
170 227.2 mm SL and lower picture 196.5 mm SL, both from the Pampulha lake, Belo Horizonte, Minas  
171 Gerais State, Brazil.

172

173 **Color in alcohol.** Overall ground color of dorsal and ventral regions of body and fins grayish-brown  
174 (Figs. 1 and 3). Head, trunk and fins covered by numerous small dark brown spots except on lower lip.  
175 Spots very small, numerous, close together and inconspicuous in head; increasing in length towards  
176 posterior region of body; spots more conspicuous on fins and dorsolateral regions of trunk. Spots on  
177 ventrolateral regions of trunk usually inconspicuous. Ventral surface of body usually with faded dark  
178 spots; conspicuousness variable among specimens. All fins with many small dark spots; spots irregularly  
179 distributed on spines and either on unbranched and branched rays. Some specimens with five faded  
180 oblique dark bars on dorsum, first bar on posterior portion of head, stronger at middle of orbit, second bar  
181 at first dorsal-fin branched rays, third bar at last dorsal-fin branched ray, fourth bar at anterior region of  
182 adipose fin and fifth bar at procurrent caudal-fin rays. Ventral surface of body slightly clearer than dorsal  
183 surface.

184

185 **Color in life.** Color pattern of living specimens similar to preserved ones, except for more green-  
186 brownish background, black and more conspicuous spots and dorsal fin with blue tan (Fig. 2).

187

188 **Sexual dimorphism.** No sexual dimorphism was observed among the specimens.

189

190 **Distribution.** *Hypostomus subcarinatus* is known from one locality (Figs. 4 and 5); the Pampulha lake,  
191 an eutrophic reservoir, in the rio das Velhas basin, city of Belo Horizonte. Apparently the distribution of  
192 *H. subcarinatus* are restricted in this locality. However, more efforts of collections are needed.

193

194 Figure 4. Geographical distribution of *Hypostomus subcarinatus*; (yellow circle = Pampulha lake). Blue  
195 shaded area and lines means the rio São Francisco basin.

196

197 **Habitat and conservation status.** *Hypostomus subcarinatus* was up to now only found in the Pampulha  
198 lake, a silted and polluted urban reservoir (Fig. 5). The Pampulha lake was formed in 1938 to water  
199 supply to the city of Belo Horizonte. Since 1970 the reservoir has become quite eutrophic due to the

200 receipt of domestic and industrial effluents from the city, causing recurrent cyanobacteria blooms [13].  
201 Friese *et al.* [14] found significant values of heavy metals in lake sediments. As *Hypostomus* are known to  
202 be detritivorous fishes they probably assimilate considerable proportions of those metals as Veado *et al.*  
203 [15] found in the onivorous cichlid *Oreochromis niloticus* in the Pampulha lake. Despite some  
204 ichthyologic survey efforts *H. subcarinatus* were up to now not collected in the surroundings of the lake.  
205 Therefore, *H. subcarinatus* with an estimated occupancy area of 1.96 km<sup>2</sup> is herein considered critically  
206 endangered (CR) according to IUCN criterion, becoming the first threatened species of the genus.  
207 *Hypostomus subcarinatus* occurs syntopically to three alien cichlids in the lake, *Coptodon rendalli*,  
208 *Oreochromis niloticus*, *Parachromis managuensis*.

209

210 Figure 5. The Pampulha lake, at downtown of the city of Belo Horizonte, Minas Gerais State, Brazil. The  
211 habitat of *Hypostomus subcarinatus*.

212

## 213 Discussion

214 Concerning external morphology, the most similar species to *Hypostomus subcarinatus* are the eastern  
215 Brazilian drainage dwellers *H. affinis*, *H. interruptus*, *H. nigrolineatus*, *H. punctatus* and *H. scabriceps*.  
216 All species has elongate and narrow body with small to medium-sized dark spots and weak to moderate  
217 keels along lateral series of plates. Besides the dorsal-fin blue tan, *H. subcarinatus* is distinguished from  
218 these congeners due to be even more elongate and lower, having a longer anal-fin unbranched ray. Anal-  
219 fin unbranched ray length is almost or equal to nostril length vs. equal to the nostril-nares distance.  
220 Additionally, *H. subcarinatus* is also distinguished from *H. nigrolineatus* by having unorganized dark  
221 spots versus dark spots horizontally aligned to form conspicuous stripes on laterals of trunk.

222 Few papers dealt with *Hypostomus* from the rio São Francisco basin and its taxonomic issue is far from  
223 being well known [16]. Most *Hypostomus* records for the basin are data from dam construction  
224 monitoring programs, not resulting in ecological or taxonomic citations on scientific papers. However,  
225 several specimens of *Hypostomus* are deposited in ichthyological collections, mainly in the Museu de  
226 Ciências Naturais da PUC-MG, ICT-UFMG, Museu Nacional and at the Museu de Zoologia,  
227 Universidade de São Paulo, among others. Except the specimens from the Pampulha lake, *H.*  
228 *subcarinatus* were not recognized from *Hypostomus* samples at these collections.

229 Finding the native *H. subcarinatus* in the Pampulha lake at downtown of the city of Belo Horizonte, the  
230 third largest metropolis of Brazil with more than 5.9 millions inhabitants, was indeed a quite unexpected  
231 event. This is a fish larger than 300 mm in total length rediscovered more than 160 years after its original



232 description and last citation. The individuals were found in the shallow, polluted urban lake, which is a  
233 significant ecological event. Some papers dealt with ecological surveys in urban neotropical streams [17,  
234 18], but focusing fish conservation on urban neotropical artificial lake is an underestimated issue. Our  
235 findings highlight the importance that taxonomic focused scientific surveys in such a highly vulnerable  
236 water bodies can reveal important data to vertebrate conservation purposes. Urban lakes are frequently  
237 dragged, canalized, dried, and cleaned, to a series of reasons for human purposes. Our finding shows that  
238 in Neotropical systems, even bad smelling urban waters as the Pampulha lake can harbor rare and  
239 endangered large fish, deserving conservation management.

240

241 **Comparative material.** All from Brazil, unless noticed: *Hypostomus alatus*: Minas Gerais State, rio São  
242 Francisco basin: NUP 9119, 1, 110.1 mm SL, rio Curimataí. NUP 9829, 5, 139.0–177.4 mm SL, rio das  
243 Velhas. NUP 9837, 4, 124.4–217.6 mm SL, rio Cipó.

244 *Hypostomus ancistroides*: São Paulo State, rio Tietê basin. LBP 2520, 2, 111.4–112.2 mm SL, rio Tietê.

245 MCP 28309, 1, 138.0 mm SL, rio Piracicaba. MCP 28310, 3, 111.0–149.0 mm SL, rio Piracicaba.

246 MZUSP 2131, 4, 95.6–165.1 mm SL, rio Tatuí. NUP 64, 2, 55.0–74.6 mm SL, rio Capivara. NUP 4012,

247 3, 75.1–86.1 mm SL, rio Ipanema. NUP 4016, 5, 89.1–133.6 mm SL, rio Corumbataí.

248 *Hypostomus aspilogaster*: Rio Grande do Sul State, rio Uruguai basin. ANSP 21781, 1, 204.0 mm SL,

249 lectotype (designated by Reis *et al.*, 1990), rio Jacuí. ANSP 21782, 3, 210.6–190.0 mm SL,

250 paralectotypes, rio Jacuí. NUP 4355, 1, 155.0 mm SL, rio Ibicuí da Armada.

251 *Hypostomus borellii*: Bolivia. Rio Paraguai basin. BMNH 1897.1.27.19, 1, 153.1 mm SL, syntype, rio

252 Pilcomayo.

253 *Hypostomus boulengeri*: Mato Grosso State, rio Paraguai basin. NUP 414, 3, 165.8–175.6 mm SL; NUP

254 3273, 8, 110.0–166.0 mm SL; NUP 8695, 1, 170.0 mm SL, rio Manso. NUP 1078, 2, 210.0–220.0 mm

255 SL, rio Manso Reservoir. NUP 8692, 1, 190.0 mm SL, rio Quilombo, rio Manso basin.

256 *Hypostomus brevicauda*: Bahia State. BMNH 1864.1.19.16–17, 2, 189.0–196.1 mm SL, syntypes. MCP

257 36709, 3, 52.7–125.4 mm SL, córrego Traira, municipality of Camacã. MZUSP 111259, 4, 40.5–113.4

258 mm SL, rio Gongogi, tributary of rio de Contas.

259 *Hypostomus carinatus*: Amazonas State, Rio Amazonas basin INPA 1198, 2, 176.7 mm SL, rio

260 Trombetas. INPA 2535, 1, 182.6 mm SL and INPA 2541, 1, 191.9 mm SL, Rio Uatumã.

261 *Hypostomus chrysostiktos*: Bahia State, ANSP 185374, 1, 166.6 mm SL, rio Paraguaçu, rio Paraguaçu

262 basin.

263 *Hypostomus commersoni*: Uruguay. Montevideo Department. Río de La Plata basin. MNHN A.9444,

264 425.00 mm SL, holotype, rio de la Plata. Brazil. Santa Catarina State, rio Uruguai basin. NUP 15804, 1,

- 265 214.0 mm SL, rio Ijuí. NUP 16849, 168.0 mm SL, rio Pelotas. MZUSP 107406, 1, 159.1 mm SL, rio São  
266 Francisco, UHE Xingó-CHEESF, downstream the reservoir.
- 267 *Hypostomus delimai*: Border of the states of Tocantins and Pará, rio Araguaia basin. NUP 11015, 1, 204.3  
268 mm SL, unnamed stream tributary of rio Araguaia. NUP 11016, 1, 176.7 mm SL, rio Lontra. NUP 11017,  
269 1, 205.5 mm SL, unnamed stream tributary of rio Araguaia.
- 270 *Hypostomus dlouhyi*: Paraguay. Alto Paraná Department. Río Paraná basin. MHNG 2229.43, 139.5 mm  
271 SL, holotype, rio Yguazú.
- 272 *Hypostomus francisci*: Minas Gerais State rio São Francisco basin. MCP 14038, 1, 180.0 mm SL, Três  
273 Marias Reservoir. NUP 9940, 6, 111.0–187.1 mm SL and NUP 9945, 2, 148.6–150.7 mm SL, rio das  
274 Velhas.
- 275 *Hypostomus garmani*: Minas Gerais State, rio São Francisco basin. BMNH 1904.1.28.3, holotype, 209.9  
276 mm SL; NUP 9819, 9, 87.7–204.2 mm SL; NUP 10028, 1, 78.8 mm SL and NUP 10031, 6, 136.6–170.2  
277 mm SL, all from rio das Velhas.
- 278 *Hypostomus jaguar*: Brazil. Bahia State, rio Paraguaçu basin. MZUSP 90870, 13, 68.8–175.6 mm SL,  
279 paratypes, rio Paraguaçu, MZUSP 110603, 164.8 mm SL, holotype, rio Paraguaçu. NUP 4448, 2, 126.8–  
280 152.9 mm SL, rio Paraguaçu.
- 281 *Hypostomus johnii*: Piauí State, rio Parnaíba basin. MCZ 7831, 1, 94.0 mm SL, syntype, rio Poti. MCZ  
282 7864, 2, 93.1–95.5 mm SL, syntypes, rio Poti. NUP 12789, 1, 139.7 mm SL, riacho Quilombo. NUP  
283 12790, 1, 91.2 mm SL, rio Poti.
- 284 *Hypostomus lima*: Minas Gerais State, rio São Francisco basin. BMNH 1876.1.10, 2, 72.9–86.1 mm SL,  
285 syntypes, Lagoa Santa. NUP5717, 4, 56.1–126.0 mm SL, ribeirão dos Patos. NUP 5721, 2, 47.5–72.8 mm  
286 SL, ribeirão das Minhocas. NUP 9827, 18, 81.5–181.5 mm SL, rio São Miguel.
- 287 *Hypostomus macrops*: Minas Gerais State, rio São Francisco basin. NUP 9831, 2, 97.7–106.8 mm SL  
288 and. NUP 9832, 1, 172.6 mm SL, Rio das Velhas. NUP 9238, 1, 157.9 mm SL, rio Curimataí.
- 289 *Hypostomus micromaculatus*: Surinam. RMNH 25483,1, 171.0 mm SL, Surinam river. RMNH 25938, 1,  
290 166.0 mm SL.
- 291 *Hypostomus nigrolineatus*: rio Jequitinhonha basin, Minas Gerais State: MZUSP 93743, 1, paratype,  
292 115.7 mm SL, rio Araçuaí, municipality of Araçuaí. MZUSP 106743, 2, 192.3–196.5 mm SL, paratypes,  
293 municipality of Padre Carvalho, rio Vacaria. NUP 15447, 2, 162.4–212.5 mm SL, paratypes,  
294 municipality of Grão Mogol, rio Itacambiruçu. NUP 16879, 3, 103.3–138.7 mm SL, paratypes,  
295 municipality of Itinga, rio Araçuaí.
- 296 *Hypostomus nudiventris*: Ceará State. ANSP 69402, 56.8 mm SL, holotype and NUP 14687, 2, 78.5–  
297 100.3 mm SL, rio Choró, municipality of Fortaleza, Northern Brazilian coastal drainages.

- 298 *Hypostomus pantherinus*: Bolivia. Beni Department. AMNH 39946, 2, 128.2–129.5 mm SL, rio Itenez,  
299 rio Guaporé basin. Brazil. Mato Grosso State. MCP 35962, 3, 112.8–141.2 mm SL, rio Guaporé, rio  
300 Madeira basin.
- 301 *Hypostomus papariae*: Rio Grande do Norte State. ANSP 69398, 94.3 mm SL, holotype, lago Papary,  
302 Northern Brazilian coastal drainages. ANSP69399, 1, 99.1 mm SL, paratype, collected with holotype.  
303 ANSP 69400, 2, 102.7–126.6 mm SL, paratypes, rio Choró, Northern Brazilian coastal drainages,  
304 municipality of Fortaleza. NUP 14684, 10, 54.6–104.4 mm SL, rio Ariri, municipality of Nisia Floresta.
- 305 *Hypostomus piratatu*: Paraguay. Paraguari Department. Río Paraguay basin. MHNG 2265.03, 214.0 mm  
306 SL, holotype, rio Paraguai.
- 307 *Hypostomus plecostomus*: Suriname. MCZ 8025, 1, 169.0 mm SL; exact locality unknown. – RMNH  
308 3102, lectotype (designated by Boeseman, 1968), 221.3 mm SL; Suriname river. – ZMA 105.023, 2,  
309 100.5–110.3 mm SL; Mama creek, Brokopondo.
- 310 *Hypostomus punctatus*: Minas Gerais State. MUP 2605, 2, 172.0–203.0 mm SL, rio Pomba. NUP 9670, 1,  
311 133.3 mm SL, tributary to rio Paraibuna, rio Paraíba do Sul basin. NUP 14483, 1, 220.3 mm SL, rio José  
312 Pedro, rio Doce basin. NUP 15488, 5, 117.5–256.6 mm SL, rio José Pedro, rio Doce basin.
- 313 *Hypostomus puserum*: Ceará State, Northern Brazilian coastal drainages. CAS 122225, 142.6 mm SL,  
314 holotype, rio Ceará Mirim; CAS 122221, 4, 94.4–141.7 mm SL, paratypes; NUP 14685, 10, 64.7–180.3  
315 mm SL, rio Ceará Mirim, Northern Brazilian coastal drainages. Rio Grande do Norte State, rio Piranhas-  
316 Açu basin. NUP 4795, 11, 140.0–207.0 mm SL, rio Acauã and NUP 14683, 2, 103.1–135.0 mm SL, rio  
317 Piranhas. Pernambuco State, rio São Francisco basin: NUP 13973, 1, 188.0 mm SL and NUP 13974, 2,  
318 197.5–221.7 mm SL, Itaparica reservoir, rio São Francisco.
- 319 *Hypostomus rhanthos*: Venezuela. AUM 42100, 4 of 8 paratypes, 161.5–176.8 mm SL; CAS 156859, 1,  
320 70.5 mm SL, rio Orinoco. MCZ 68123, 1, 35.0 mm SL. rio Orinoco basin. – LBP 2185, 1, 80.2 mm SL;  
321 rio Cataniapo.
- 322 *Hypostomus tapijara*: Paraná State, rio Ribeira de Iguape basin. NUP 863, 9, 85.9–251.3 mm SL; NUP  
323 869, 25, 111.0–350.0 mm SL and NUP 2795, 3, 174.9–193.2 mm SL, rio Capivari.
- 324 *Hypostomus unae*: Bahia State, rio de Contas basin. NUP 9811, 5, 78.9–53.7 mm SL, rio das Pedras,  
325 NUP 9814, 81.5–102.7 mm SL, rio Oricó. MCP 41473, 10, 80.2–126.5 mm SL, rio Preto do Costa. Rio  
326 Pardo basin. MCP 41334, 3, 55.2–120.8 mm SL, rio Panelinha.
- 327 *Hypostomus velhochico*: rio São Francisco basin. Minas Gerais State: MZUSP 73816, 1, 83.4 mm SL,  
328 paratype, municipality of Presidente Juscelino. NUP 12065, 92.6 mm SL, paratype, municipality of  
329 Pirapora, rio das Velhas. NUP 12066, 1, 82.8 mm SL, paratype, municipality of Santana do Pirapama, rio  
330 das Velhas. NUP 12067, 1, 80.2 mm SL, paratype, municipality of Santana do Pirapama, rio das Velhas.

331 *Hypostomus watwata*: French Guyana. MNHN A. 8919 (lectotype of *Hypostomus verres* designated by  
332 Boeseman, 1968), 194.5 mm SL, Rio Cayenne. Guyana. BMNH 1932.11.10.31 (neotype designated by  
333 Boeseman, 1868), 261.2 mm SL, Berbice River.

334 *Hypostomus wuchereri*: Bahia State. BMNH1863.3.27.15, 1, syntype, 203.8 mm SL, unknown exact  
335 locality. BMNH 1852.13.12.8, 1, 127.3 mm SL, syntype, unknown exact locality.

336

## 337 **Acknowledgments**

338 The authors are grateful to Filipe Azevedo (UEM), Rafael Dhovany Marques, João Batista for help in the  
339 field collectors. Augusto Frota (UEM) for helping with the map; and Celso Ikedo for helping with fish  
340 pictures. Thanks to Barbara Brown and Scott Schaefer (AMNH), Mark Sabaj (ANSP), Patrick Campbell  
341 (BMNH), David Catania and Tomio Iwamoto (CAS), Mary Anne Rogers and Kevin Swagel (FMNH),  
342 Amanda Cocovicki, Fábio Vieira and Paulo Anchieta Garcia (ICT-UFMG), Lucia Rapp Py-Daniel and  
343 Renildo Ribeiro (INPA), Carlos Lucena and Margarete Lucena (MCP), Gilmar Bastos Santos (MCNIP)  
344 Claude Weber and Sonia Muller (MHNG), Patrice Pruvost (MNHN), Paulo Buckup, Marcelo Britto and  
345 Cristiano Moreira (MNRJ), Ernst Mikschi and Helmut Wellendorf (NMW), Ronald Vonk and Ronald de  
346 Ruiter (ZMA) for loan comparative material and hosting museum visits. Nupélia provided logistical  
347 support. Capes (Coordenação de Aperfeiçoamento de Pessoal de Nível Superior) provided grants to ISP.  
348 We highlight that our experiment was carried out in accordance with the ‘Ethical Principles in Animal  
349 Research’ adopted by the Brazilian College of Animal Experimentation (COBEA). The authors declare  
350 that they have no conflict of interest.

351

## 352 **Author Contributions**

353 **Conceptualization:** Cláudio Henrique Zawadzki.

354 **Data curation:** Cláudio Henrique Zawadzki, Iago de Souza Penido, Tiago Casarim Pessali.

355 **Investigation:** Cláudio Henrique Zawadzki, Iago de Souza Penido.

356 **Methodology:** Cláudio Henrique Zawadzki, Iago de Souza Penido, Tiago Casarim Pessali.

357 **Project administration:** Cláudio Henrique Zawadzki.

358 **Writing – Original Draft Preparation:** Cláudio Henrique Zawadzki, Iago de Souza Penido, Tiago  
359 Casarim Pessali.

360 **Writing – Review & Editing:** Cláudio Henrique Zawadzki, Iago de Souza Penido, Tiago Casarim  
361 Pessali.

362

## 363 **References**

364

- 365 1. Castelnau FL. Poissons. In: Castelnau, F.L. Animaux nouveaux or rares recueillis pendant l'expédition  
366 dans les parties centrales de l'Amérique du Sud, de Rio de Janeiro a Lima, et de Lima au Para. Paris,  
367 Bertrand; 1855. pp. 112.
- 368 2. Weber C. Subfamily Hypostominae. Pp. 351–372. In: R.E. Reis, S. O. Kullander & C. J. Ferraris Jr.  
369 (Eds.). Check List of the Freshwater Fishes of South and Central America. Porto Alegre, Edipucrs;  
370 2003. pp. 729.
- 371 3. Britski HA, Sato Y, Rosa ABS. Manual de identificação de peixes da região de Três Marias (com  
372 chave de identificação para os peixes da bacia do São Francisco). Brasília, Câmara dos  
373 Deputados/CODEVASF; 1988. 143 pp.
- 374 4. Alves CBM, Leal CG. Aspectos da conservação da fauna de peixes da bacia do rio São Francisco em  
375 Minas Gerais. MG Biota. 2010; 2 (6): 26–50.
- 376 5. Griffiths, SP. The use of clove oil as an anesthetic and method for sampling intertidal rockpool fishes.  
377 Journal of Fish Biology. 2000; 57: 1453–1464.
- 378 6. Boseman M. The genus *Hypostomus* Lacépède, 1803, and its Surinam representatives (Siluriformes,  
379 Loricariidae). Zool Verhandl. 1968; 99: 1–89.
- 380 7. Weber C. *Hypostomus dlouhyi*, nouvelle espèce de poisson-chat cuirassé du Paraguay (Pisces,  
381 Siluriformes, Loricariidae). Rev suis Zool. 1985; 92: 955–968.
- 382 8. Zawadzki CH, Weber C, Pavanelli CS. Two new species of *Hypostomus* Lacépède (Teleostei:  
383 Loricariidae) from the upper rio Paraná basin, Central Brazil. Neotrop Ichthyol. 2008; 6: 403–412.  
384 <http://dx.doi.org/10.1590/s1679-62252008000300013>
- 385 9. Schaefer SA. The Neotropical cascudinhos: systematics and biogeography of the *Otocinclus* catfishes  
386 (Siluriformes: Loricariidae). Proc Acad Nat Sci Phila. 1997; 148: 1–120.
- 387 10. Oyakawa OT, Akama A, Zanata AM. Review of the genus *Hypostomus* Lacépède, 1803 from rio  
388 Ribeira de Iguape basin, with description of a new species (Pisces, Siluriformes, Loricariidae).  
389 Zootaxa. 2005; 921: 1–27.
- 390 11. Fricke R, Eschmeyer WN. (2018) Guide to field collections. Online version, updated 30 June 2017.  
391 Available from: <http://researcharchive.calacademy.org/research/ichthyology/catalog/collections.asp>  
392 (eletronic version accessed 28 July 2018).
- 393 12. IUCN Standards and Petitions Subcommittee. 2017. Guidelines for Using the IUCN Red List  
394 Categories and Criteria. Version 13. Prepared by the Standards and Petitions Subcommittee.  
395 Downloadable from <http://www.iucnredlist.org/documents/RedListGuidelines.pdf>
- 396 13. Pinto-Coelho RM. Effects of eutrophication on seasonal patterns of mesozooplankton in a tropical  
397 reservoir: a 4-year study in Pampulha Lake, Brazil. Freshw Biol. 1998; 40: 159–173.
- 398 14. Friese K, Schmidt G, de Lena JC, Nalini HA Jr, Zachmann DW. Anthropogenic influence on the  
399 degradation of an urban lake – The Pampulha reservoir in Belo Horizonte, Minas Gerais, Brazil.  
400 Limnologica. 2010; 40: 114–125. doi: 10.1016/j.limno.2009.12.001
- 401 15. Veado MARV, Heeren AO, Severo MI, Grenier-Loustalot MF, Arantes IA, Cabaleiro HL, Almeida  
402 MRMG. INAA and ICP-MSHS: Metal pollutants in fish tissues Nile tilapia (*Oreochromis niloticus*)  
403 in Pampulha Lake, Belo Horizonte city, Minas Gerais State, Brazil. J Radional Nucl Ch. 2007; 272  
404 (3): 511–514. doi: 10.1007/s10967-007-0613-3

- 405 16. Zawadzki CH, Oyakawa OT, Britski AA. *Hypostomus velhochico*, a new keeled *Hypostomus*  
406 Lacépède, 1803 (Siluriformes: Loricariidae) from the rio São Francisco basin in Brazil. *Zootaxa*.  
407 2017; 4344: 560–572.
- 408 17. Cunico AM, Ferreira EA, Agostinho AA, Beaumord AC, Fernandes R. The effects of local and  
409 regional environmental factors on the structure of fish assemblages in the Pirapó Basin, Southern  
410 Brazil. *Landsc Urban Plan*. 2012; 105: 336–344.
- 411 18. Zanatta N, Pazianoto LHR, Cionek VM, Sacramento PA, Benedito E. Population structure of fishes  
412 from an urban stream. *Acta Sci Biol Sci*. 2017; 39: 27–34.



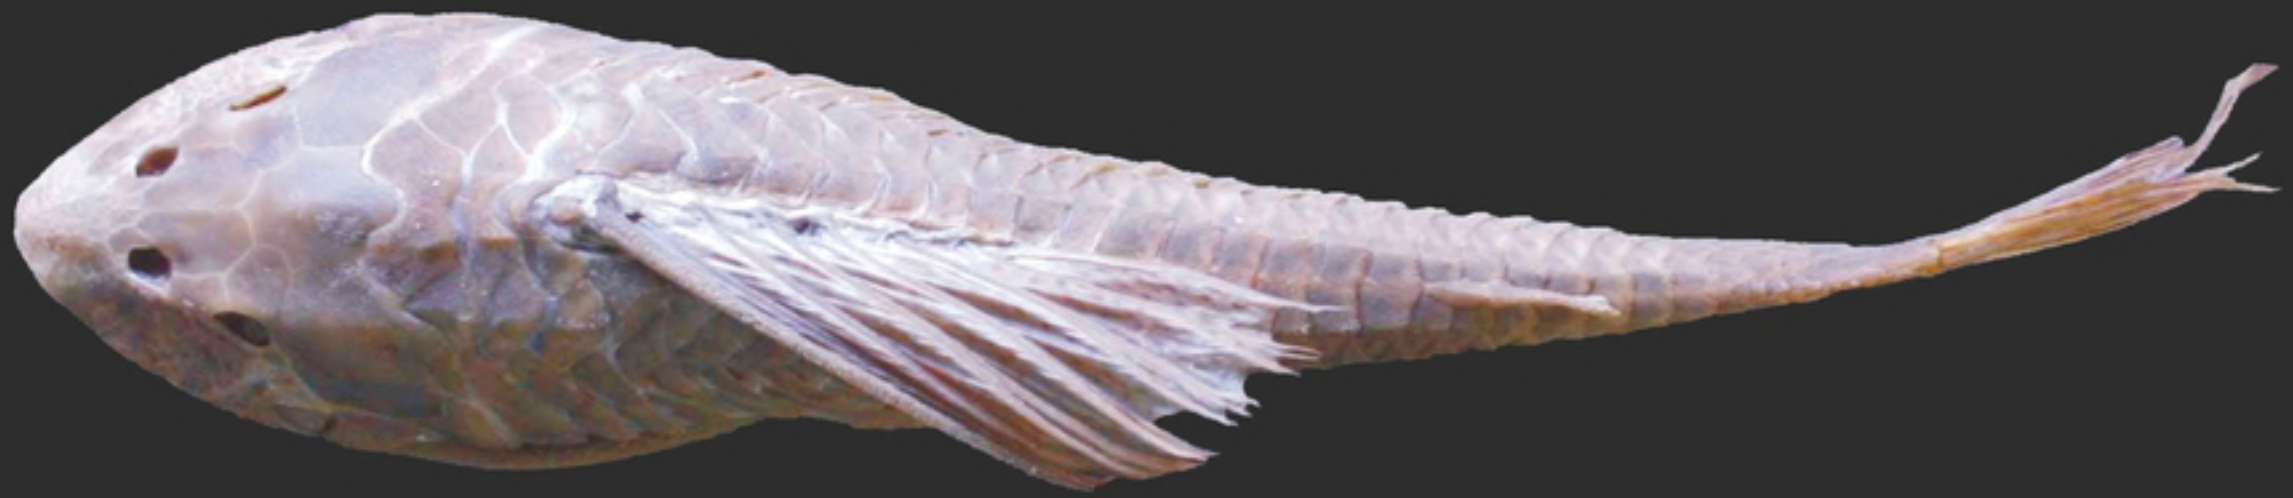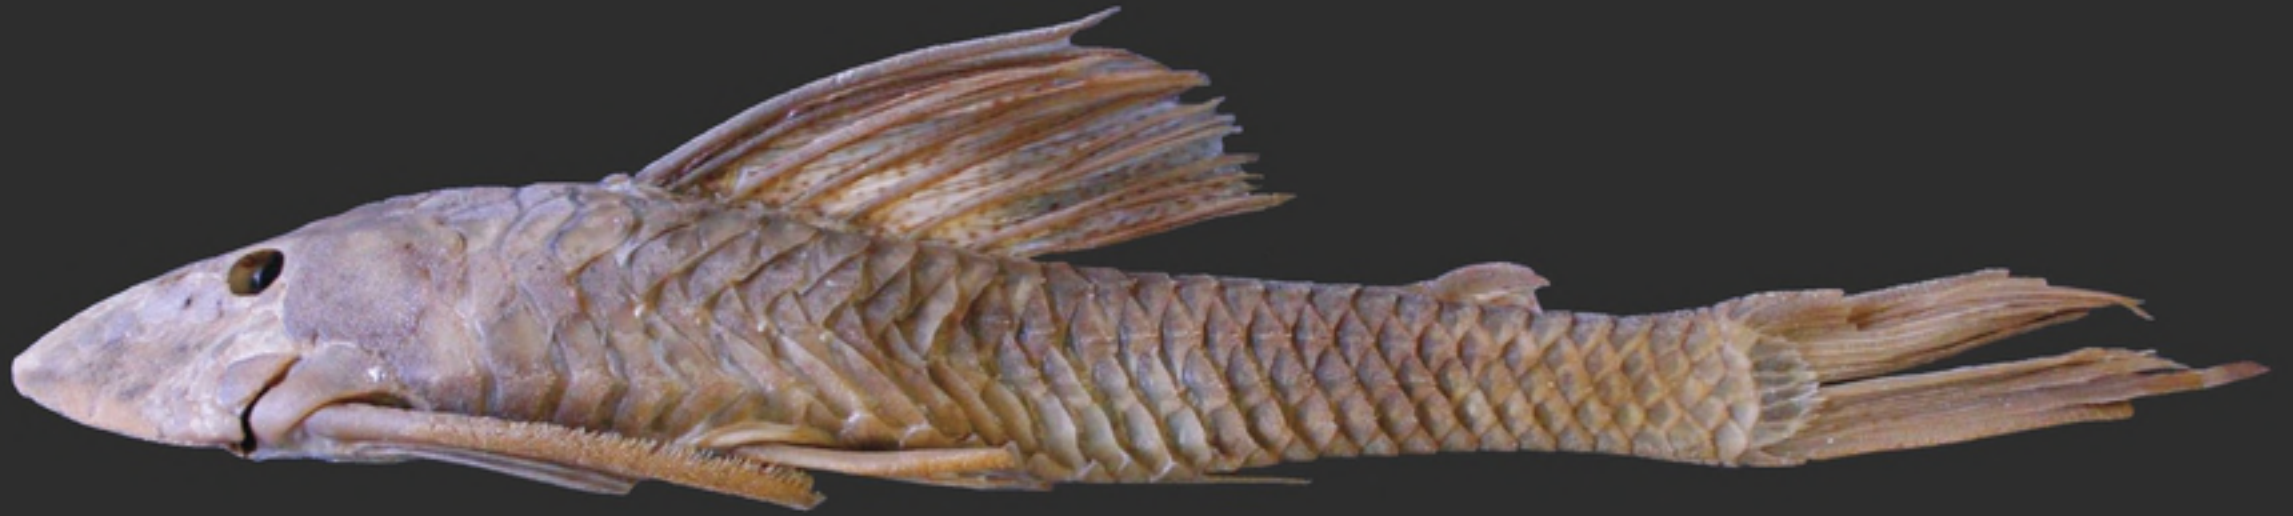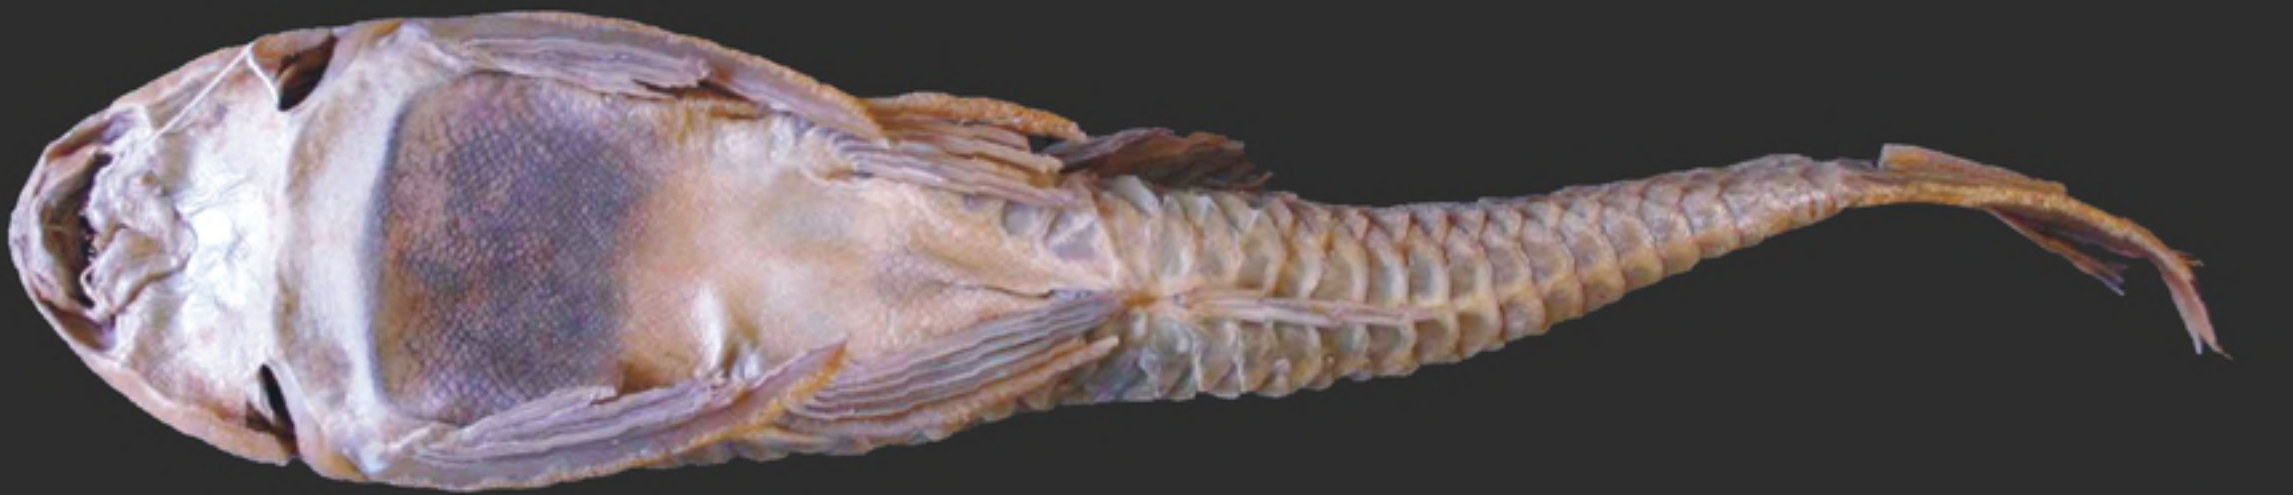

Figure 1



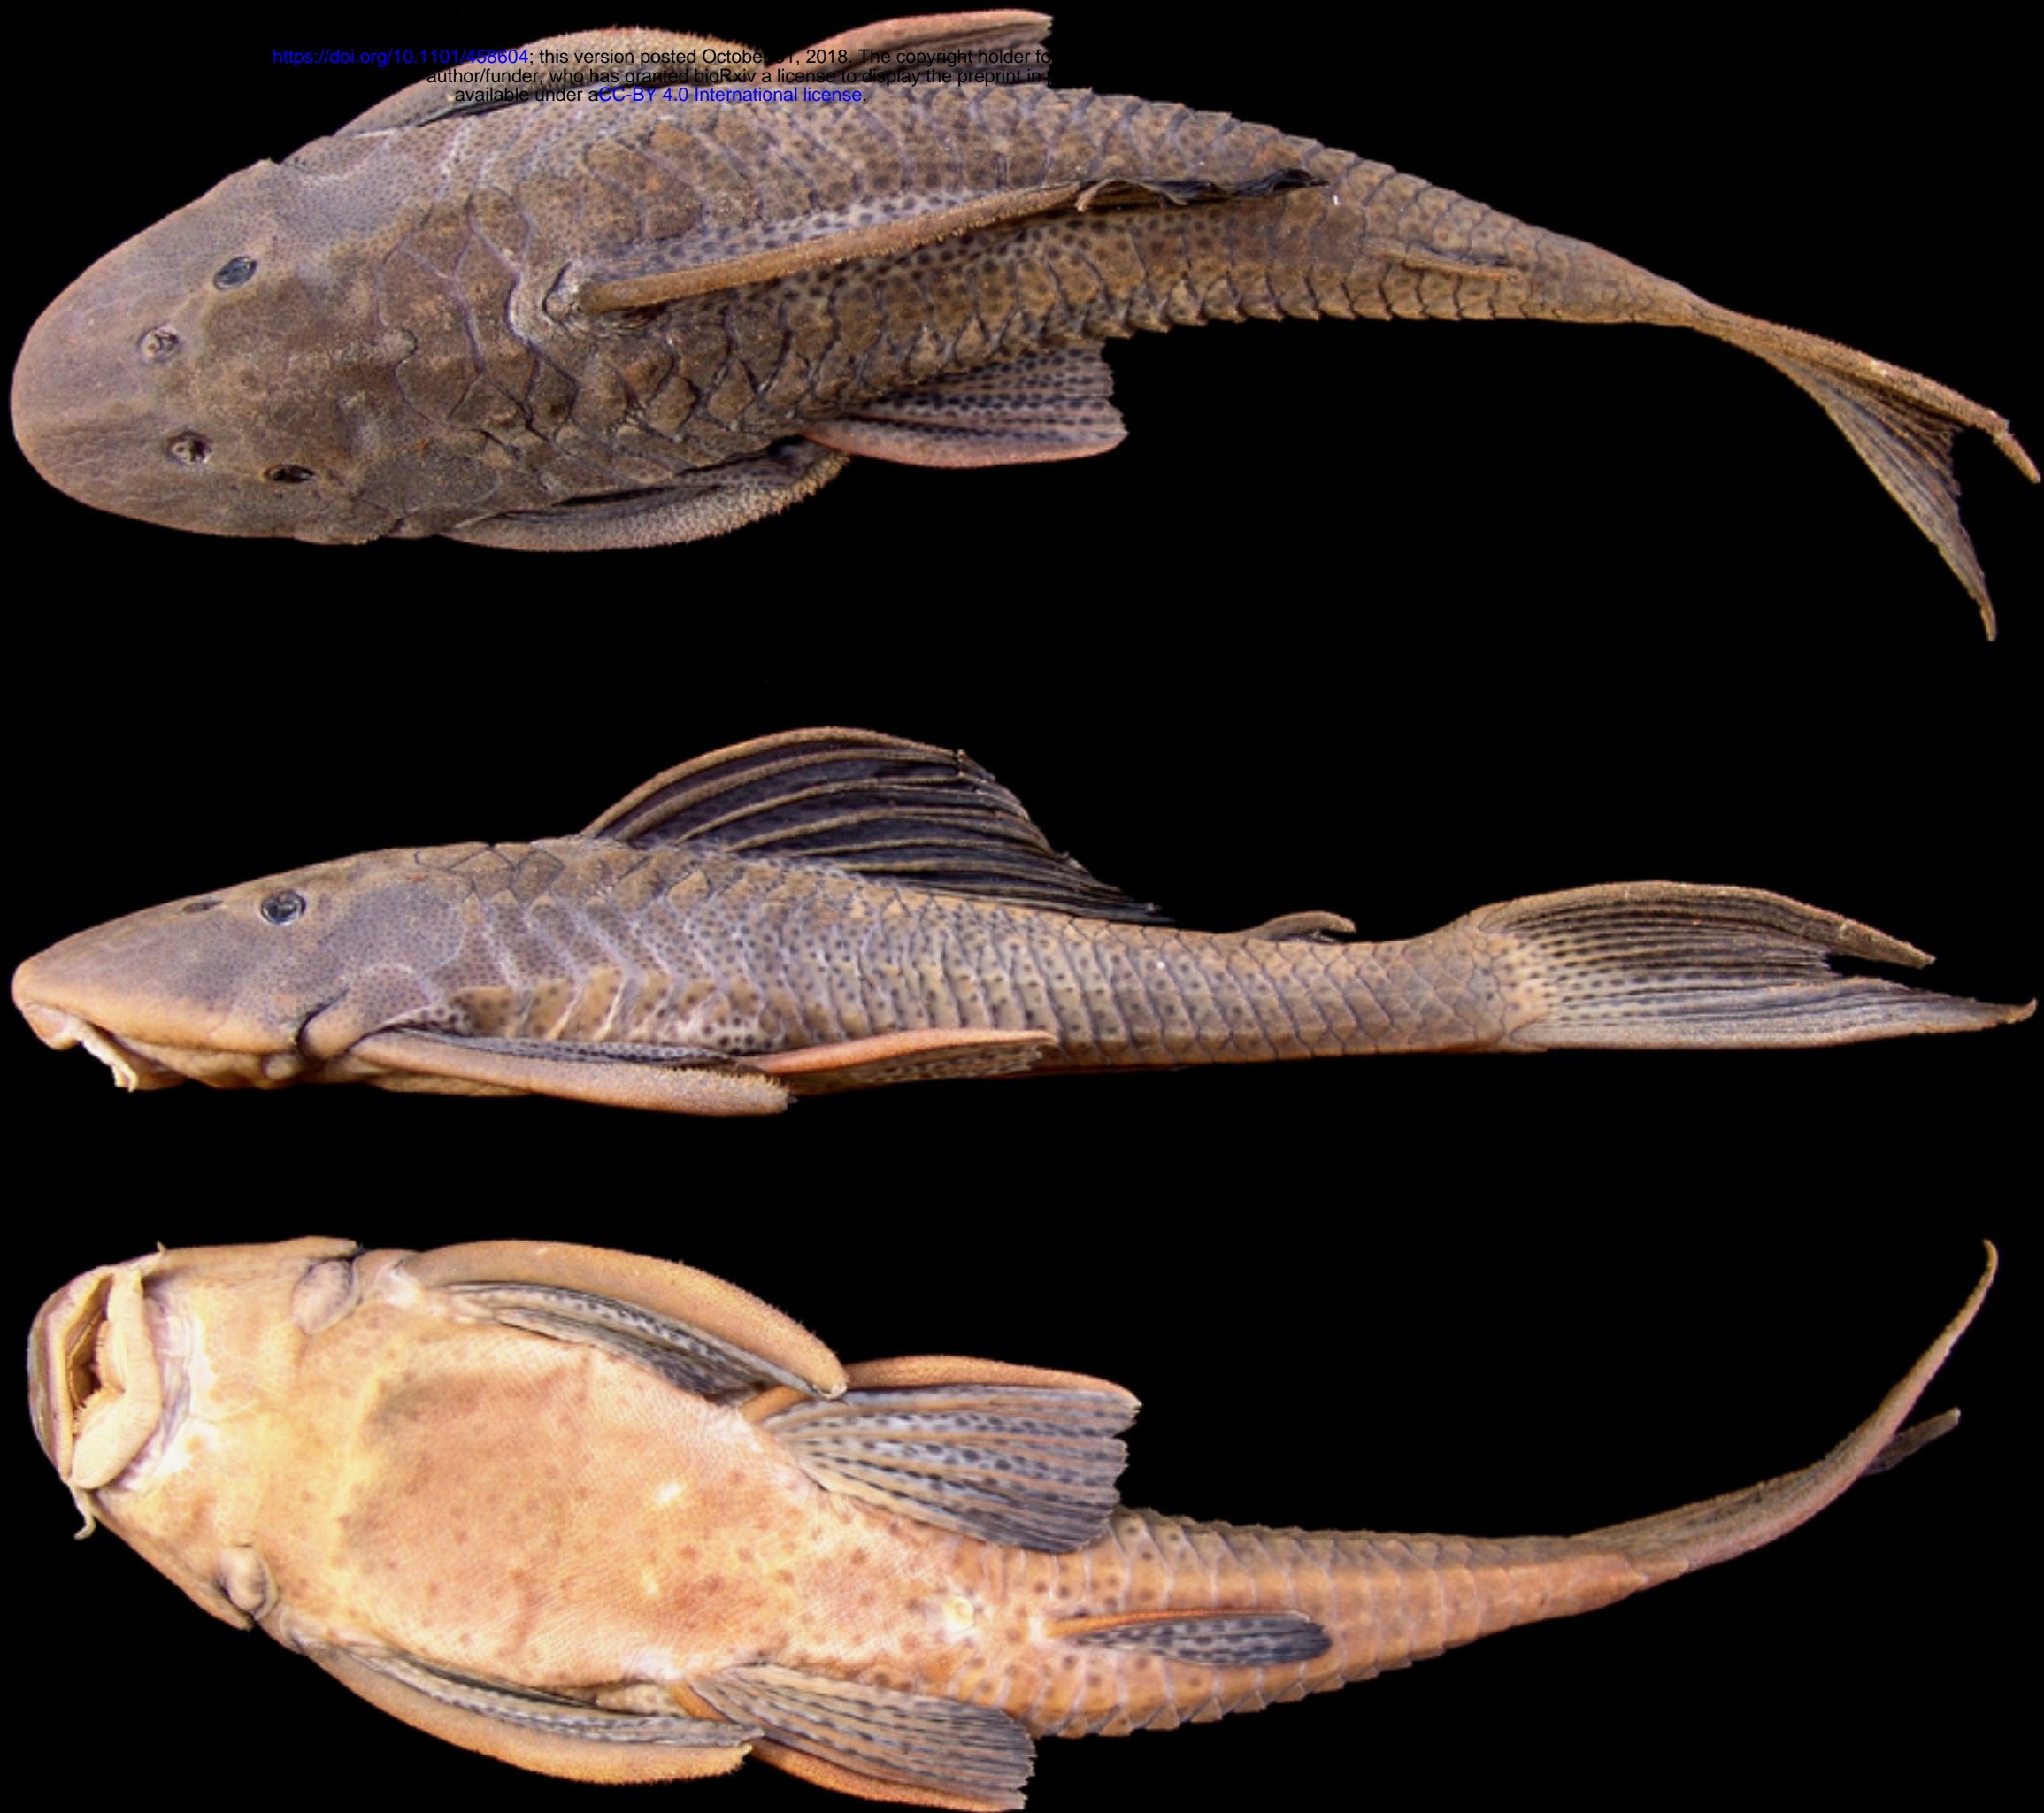

Figure 2



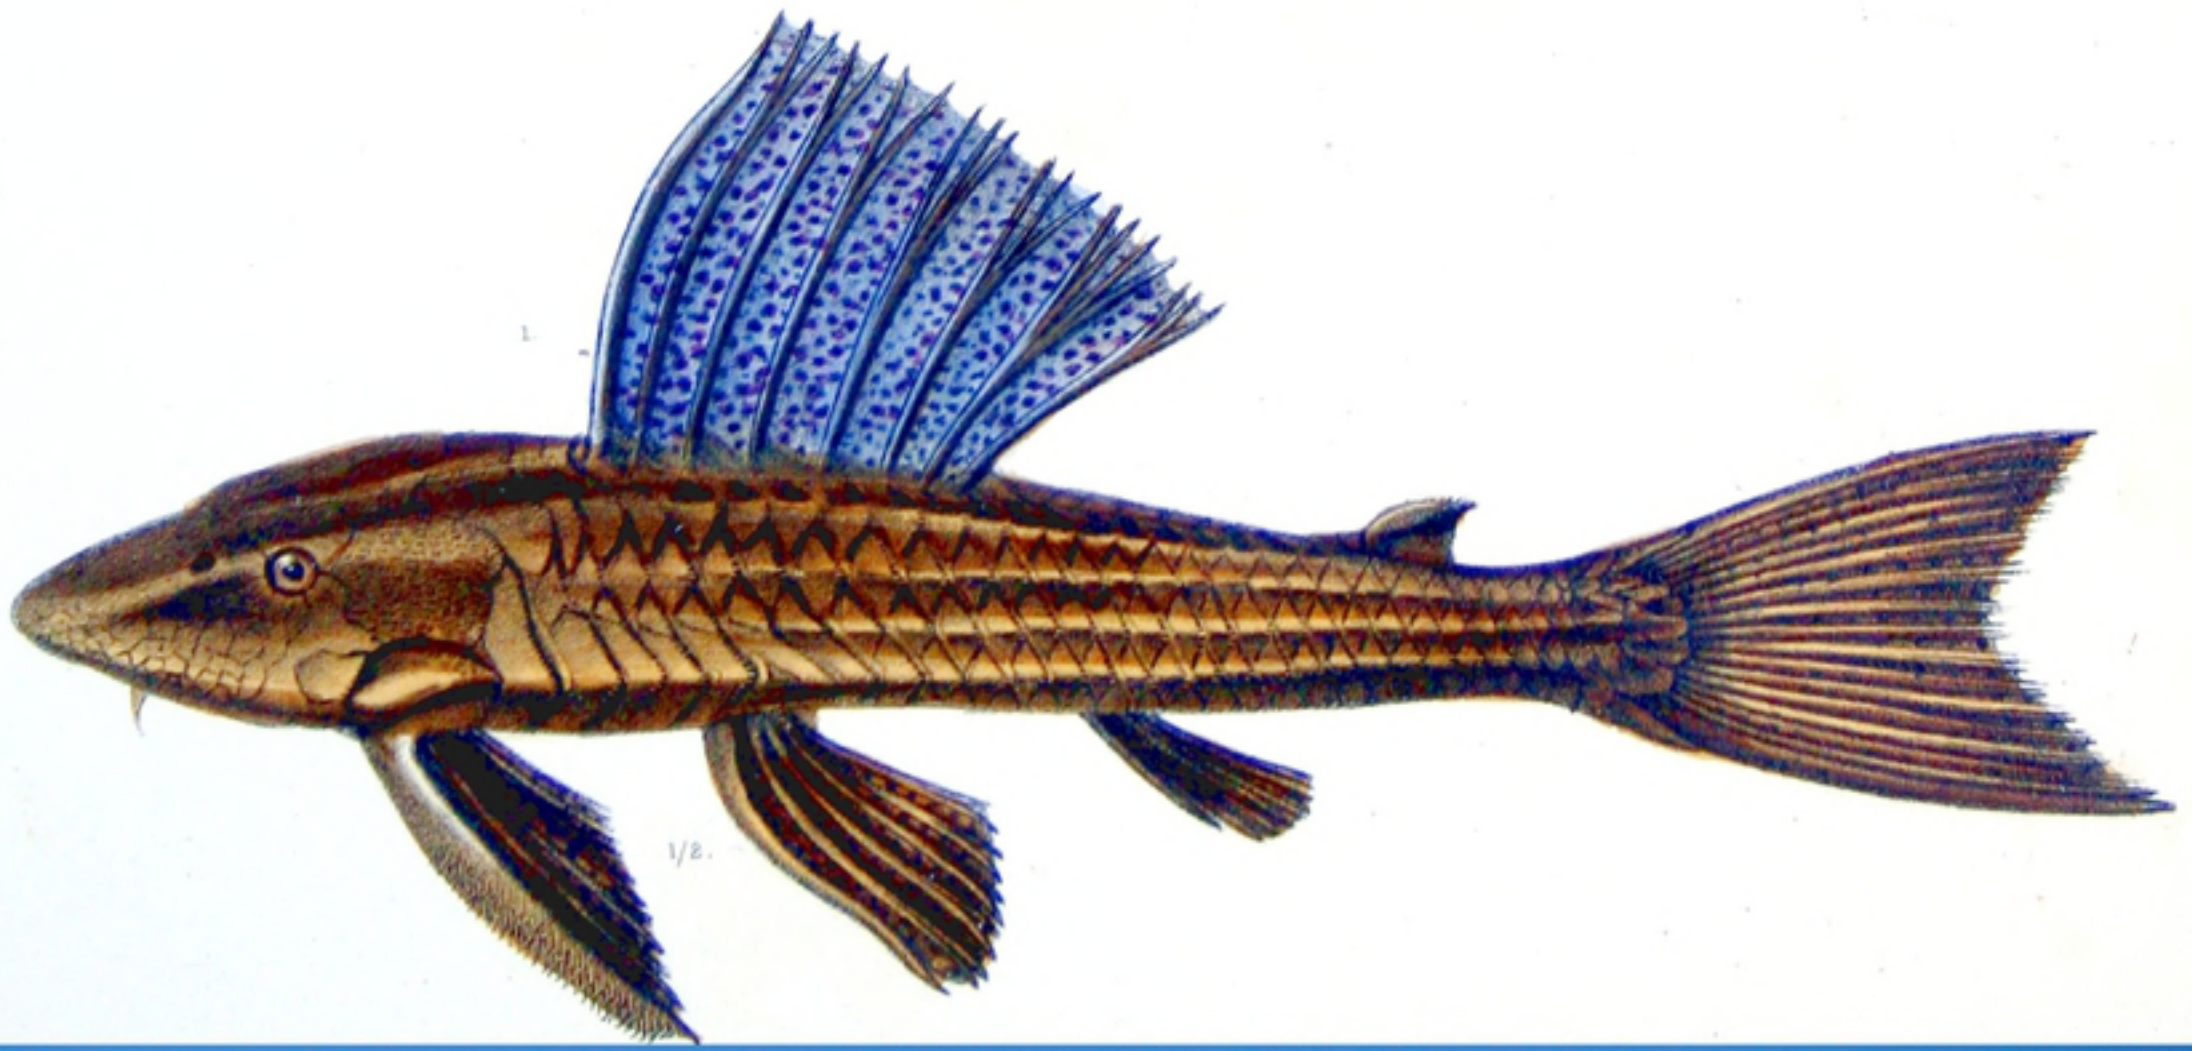

bioRxiv preprint doi: <https://doi.org/10.1101/458604>; this version posted October 31, 2018. The copyright holder for this preprint (which was not certified by peer review) is the author/funder, who has granted bioRxiv a license to display the preprint in perpetuity. It is made available under aCC-BY 4.0 International license.

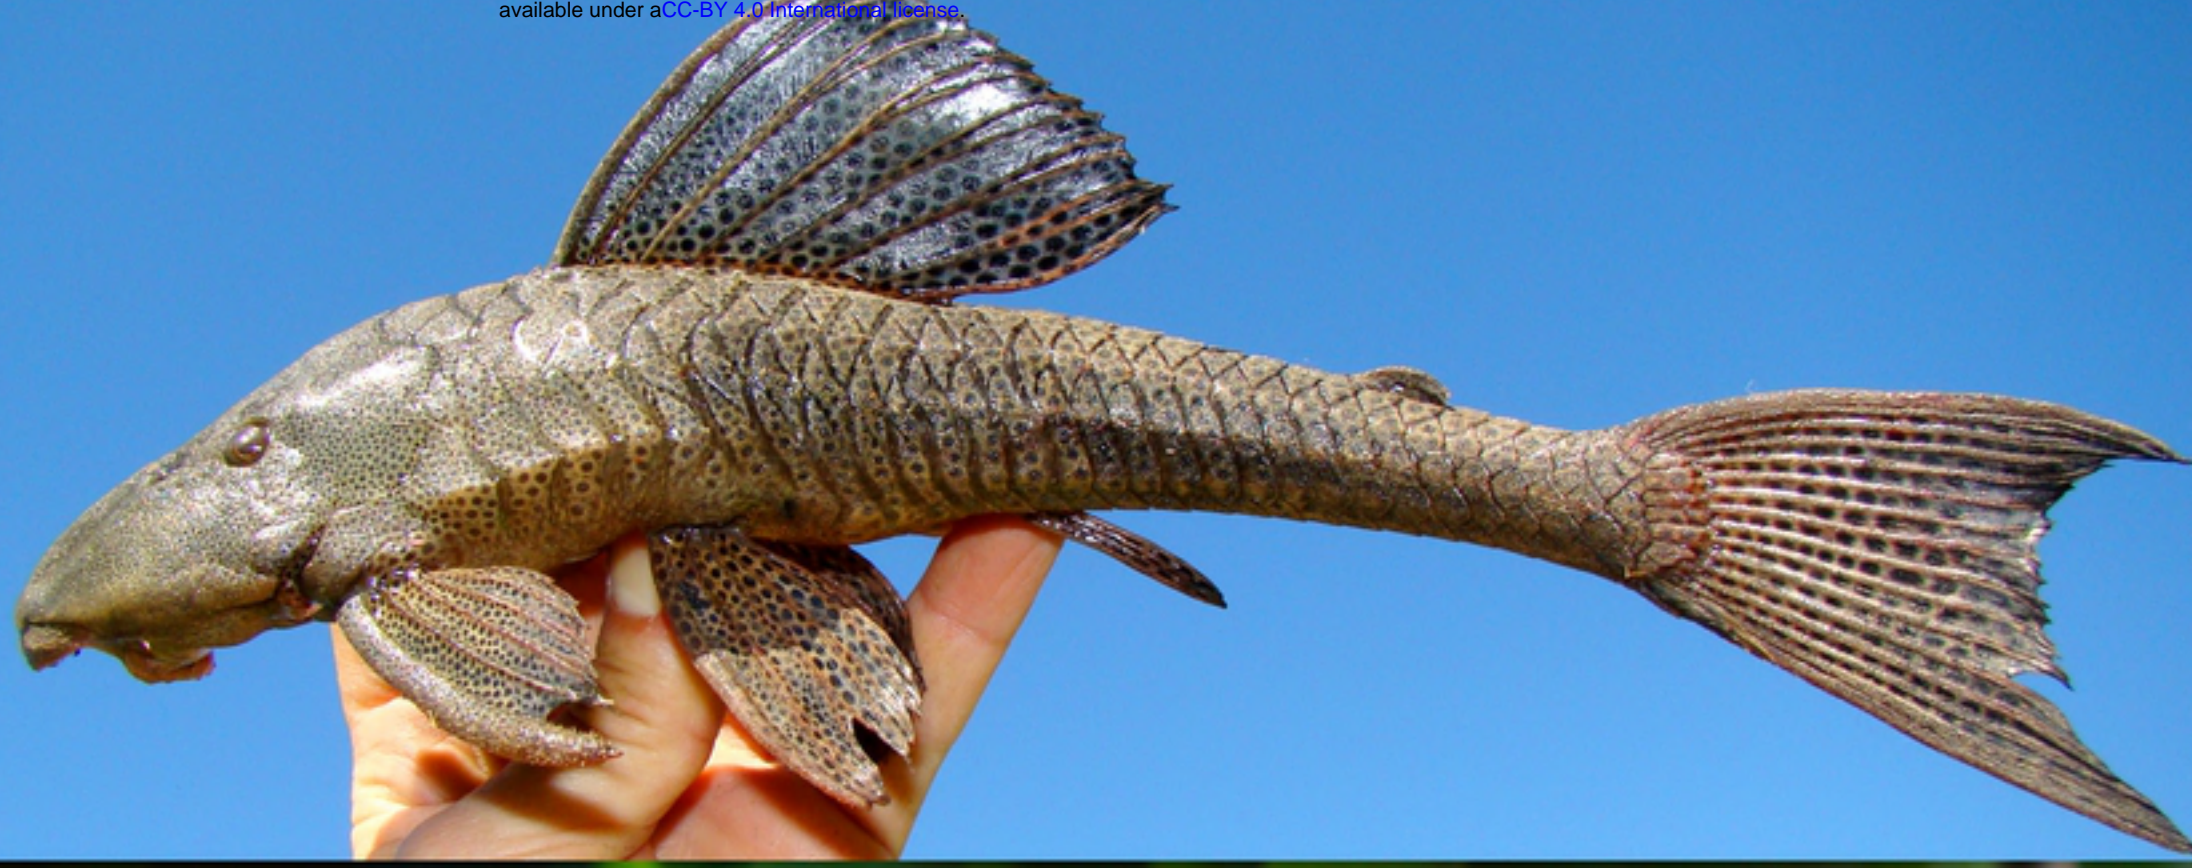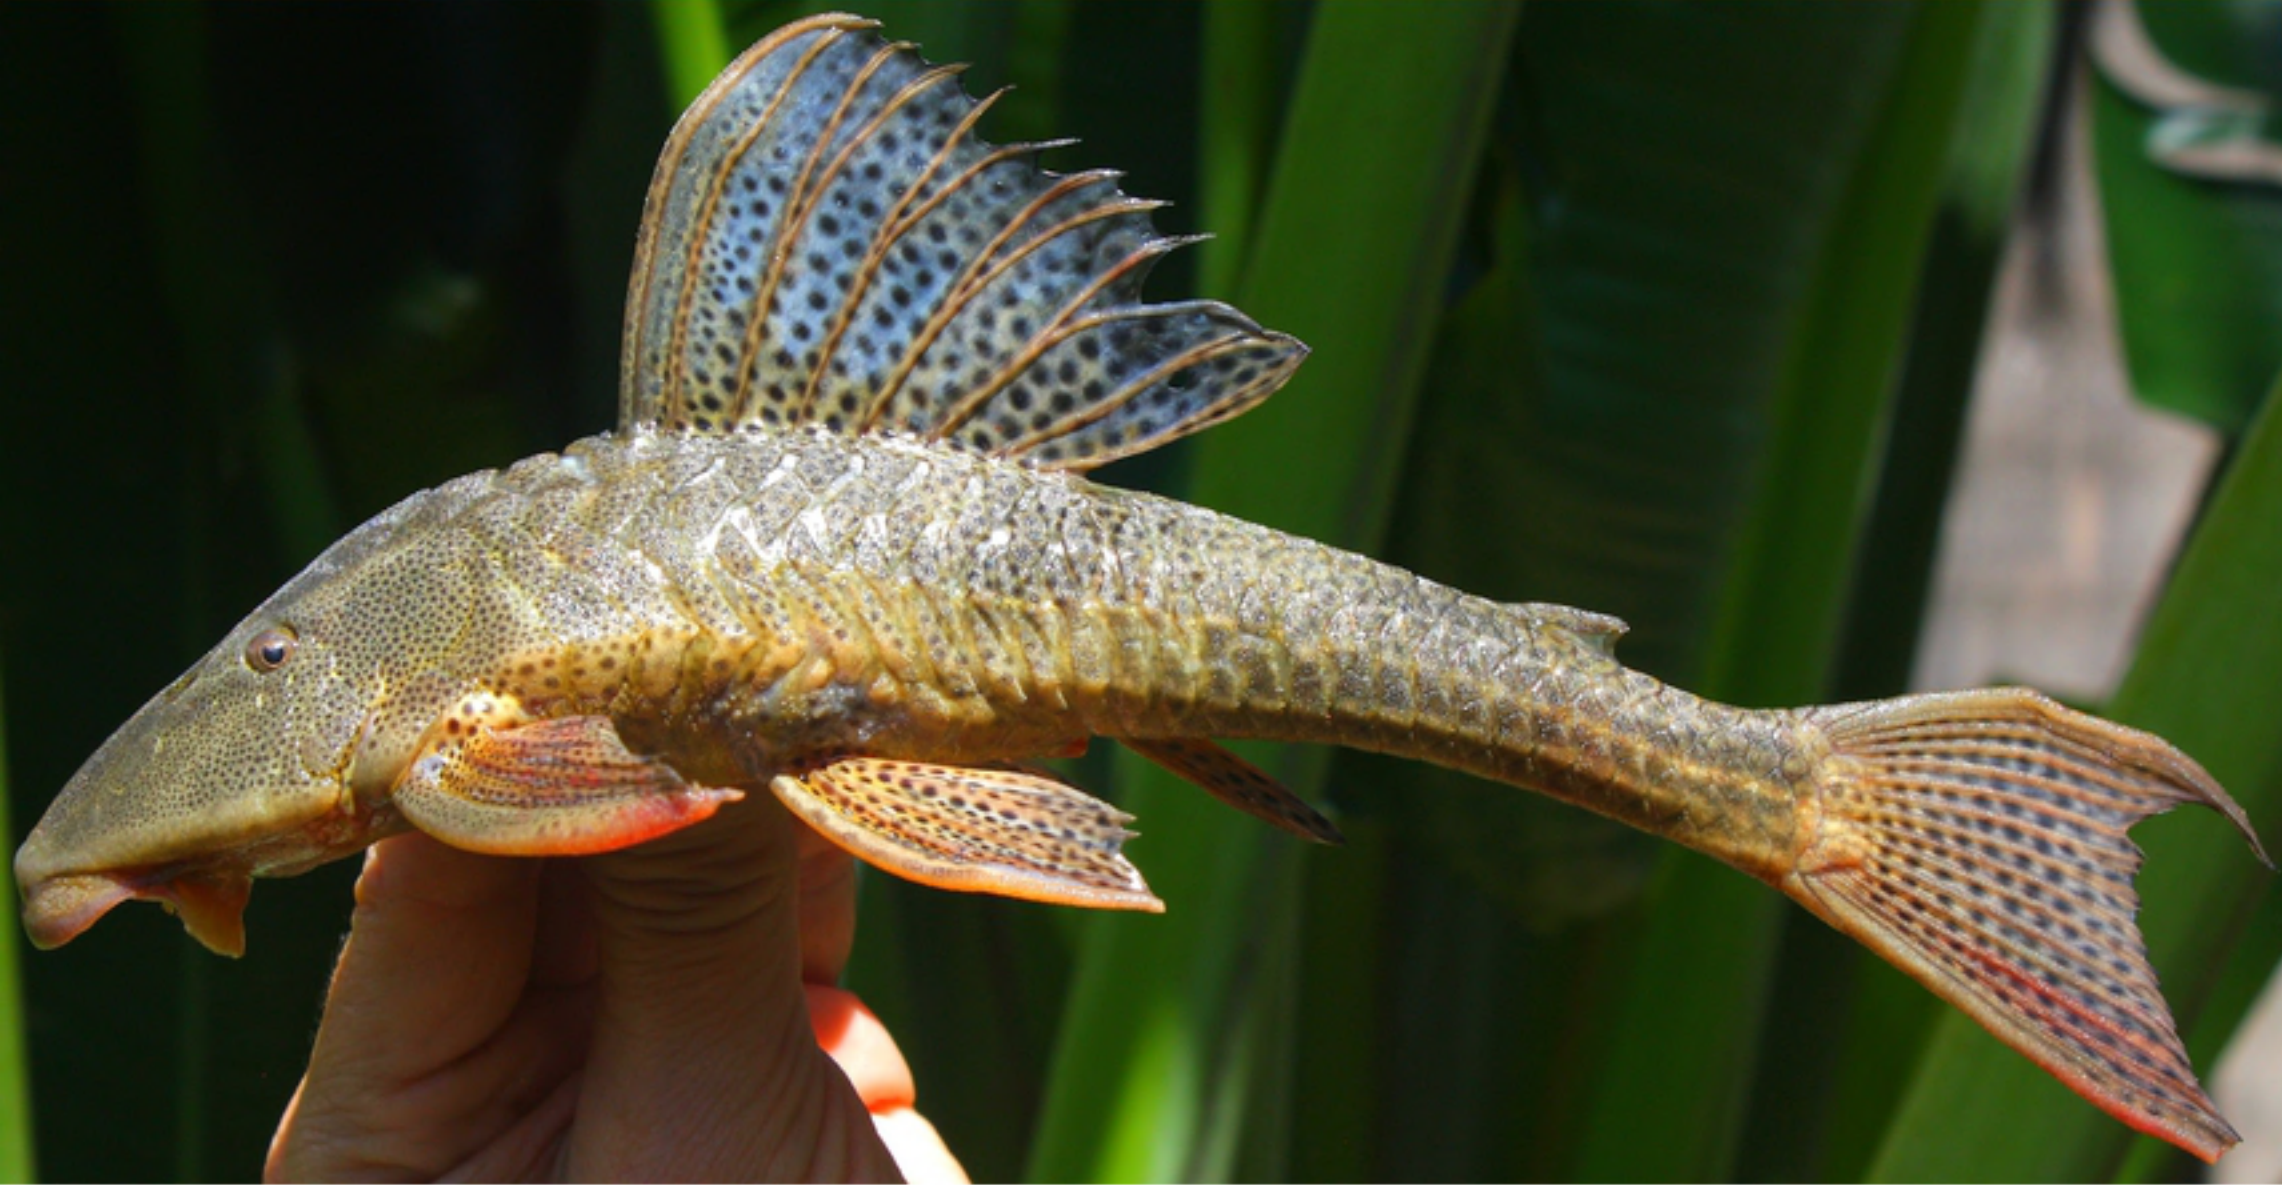

Figure 3



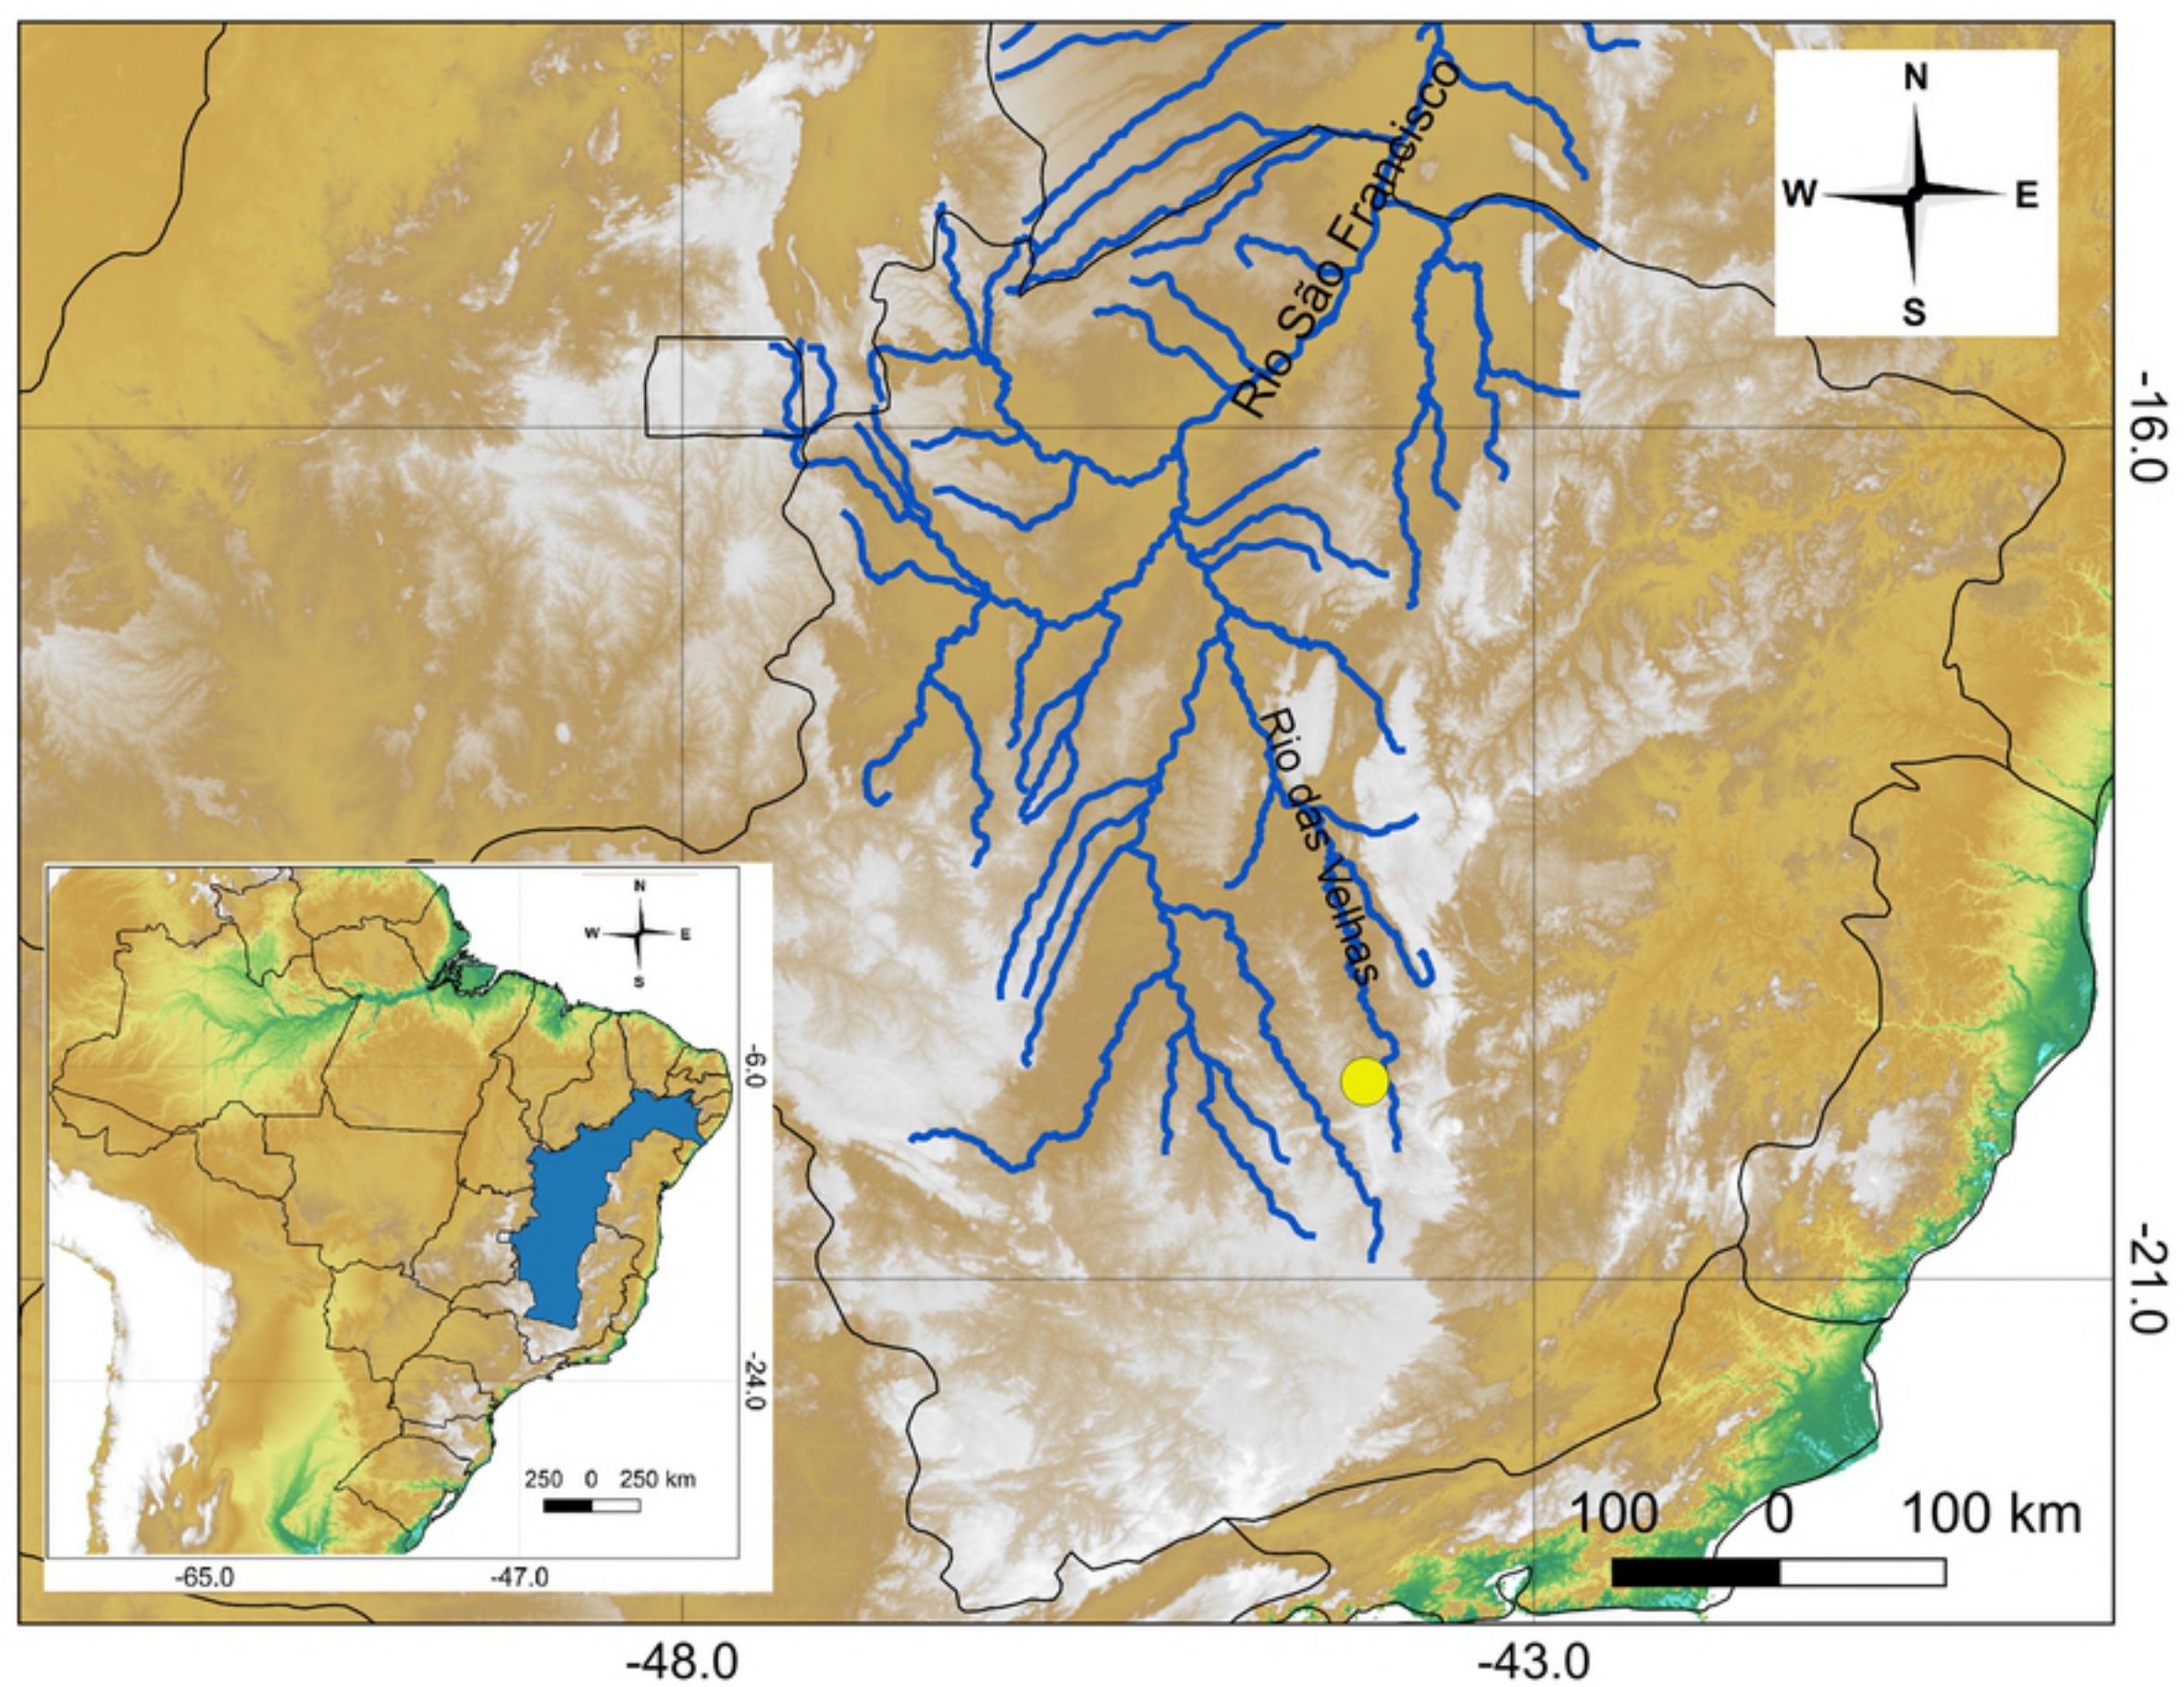

Figure 4



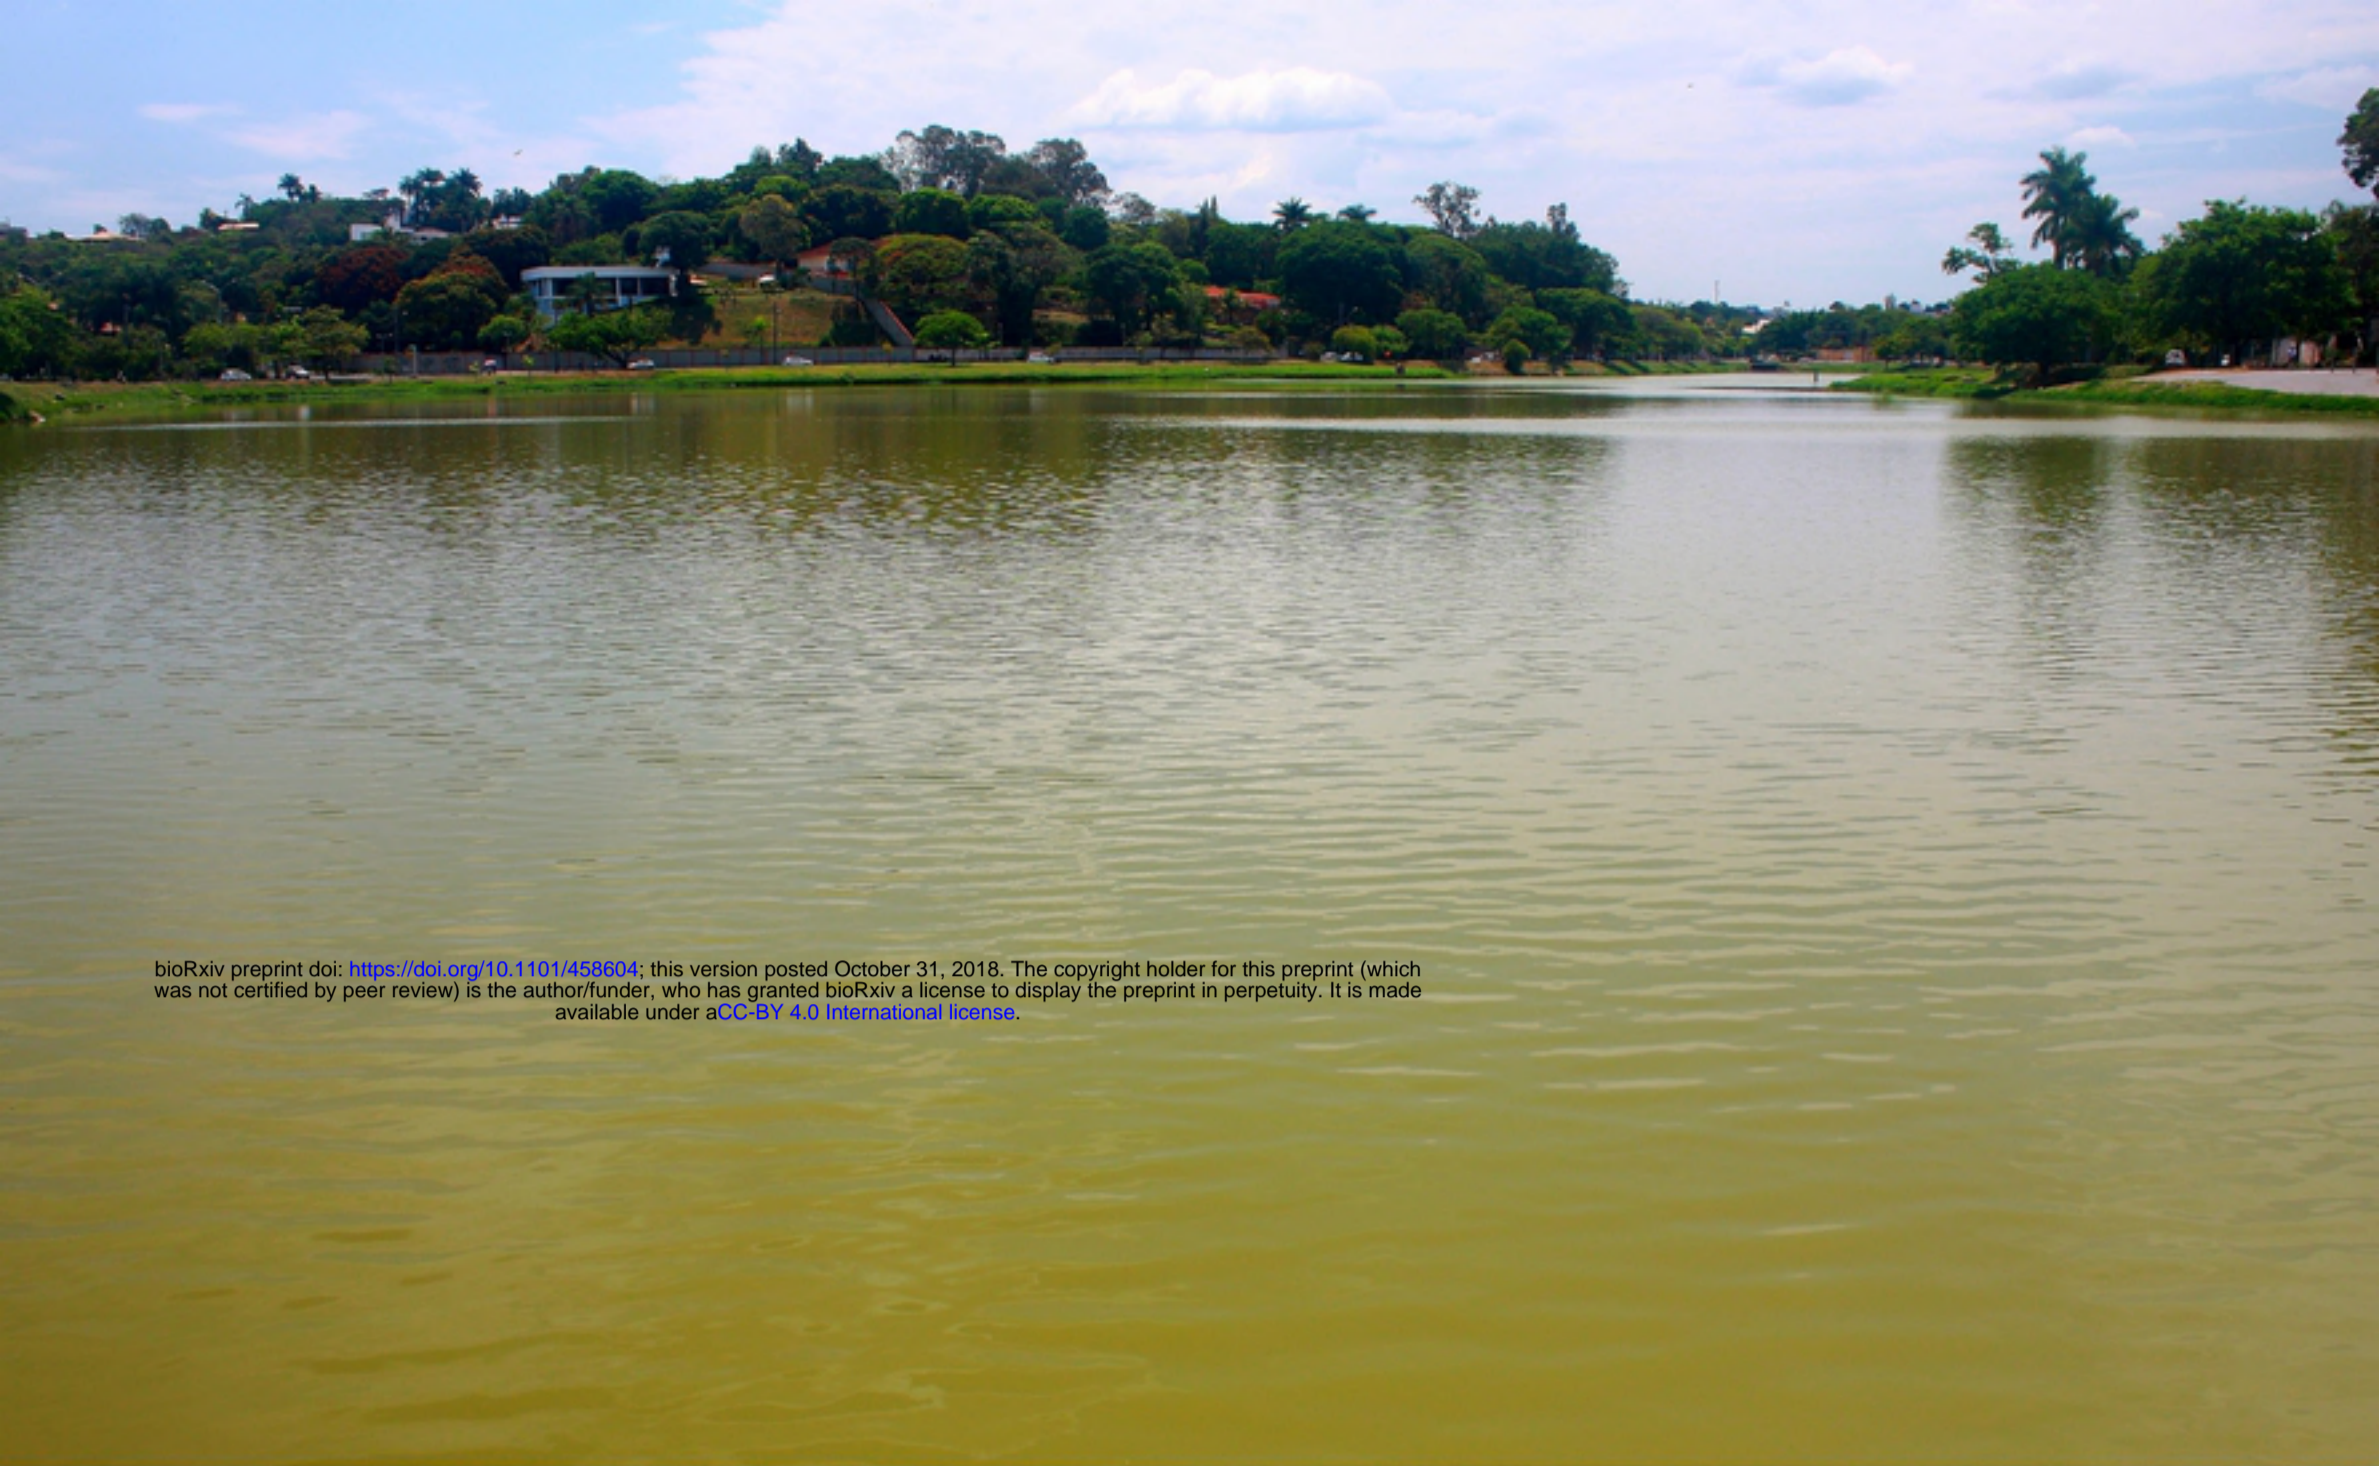

bioRxiv preprint doi: <https://doi.org/10.1101/458604>; this version posted October 31, 2018. The copyright holder for this preprint (which was not certified by peer review) is the author/funder, who has granted bioRxiv a license to display the preprint in perpetuity. It is made available under aCC-BY 4.0 International license.

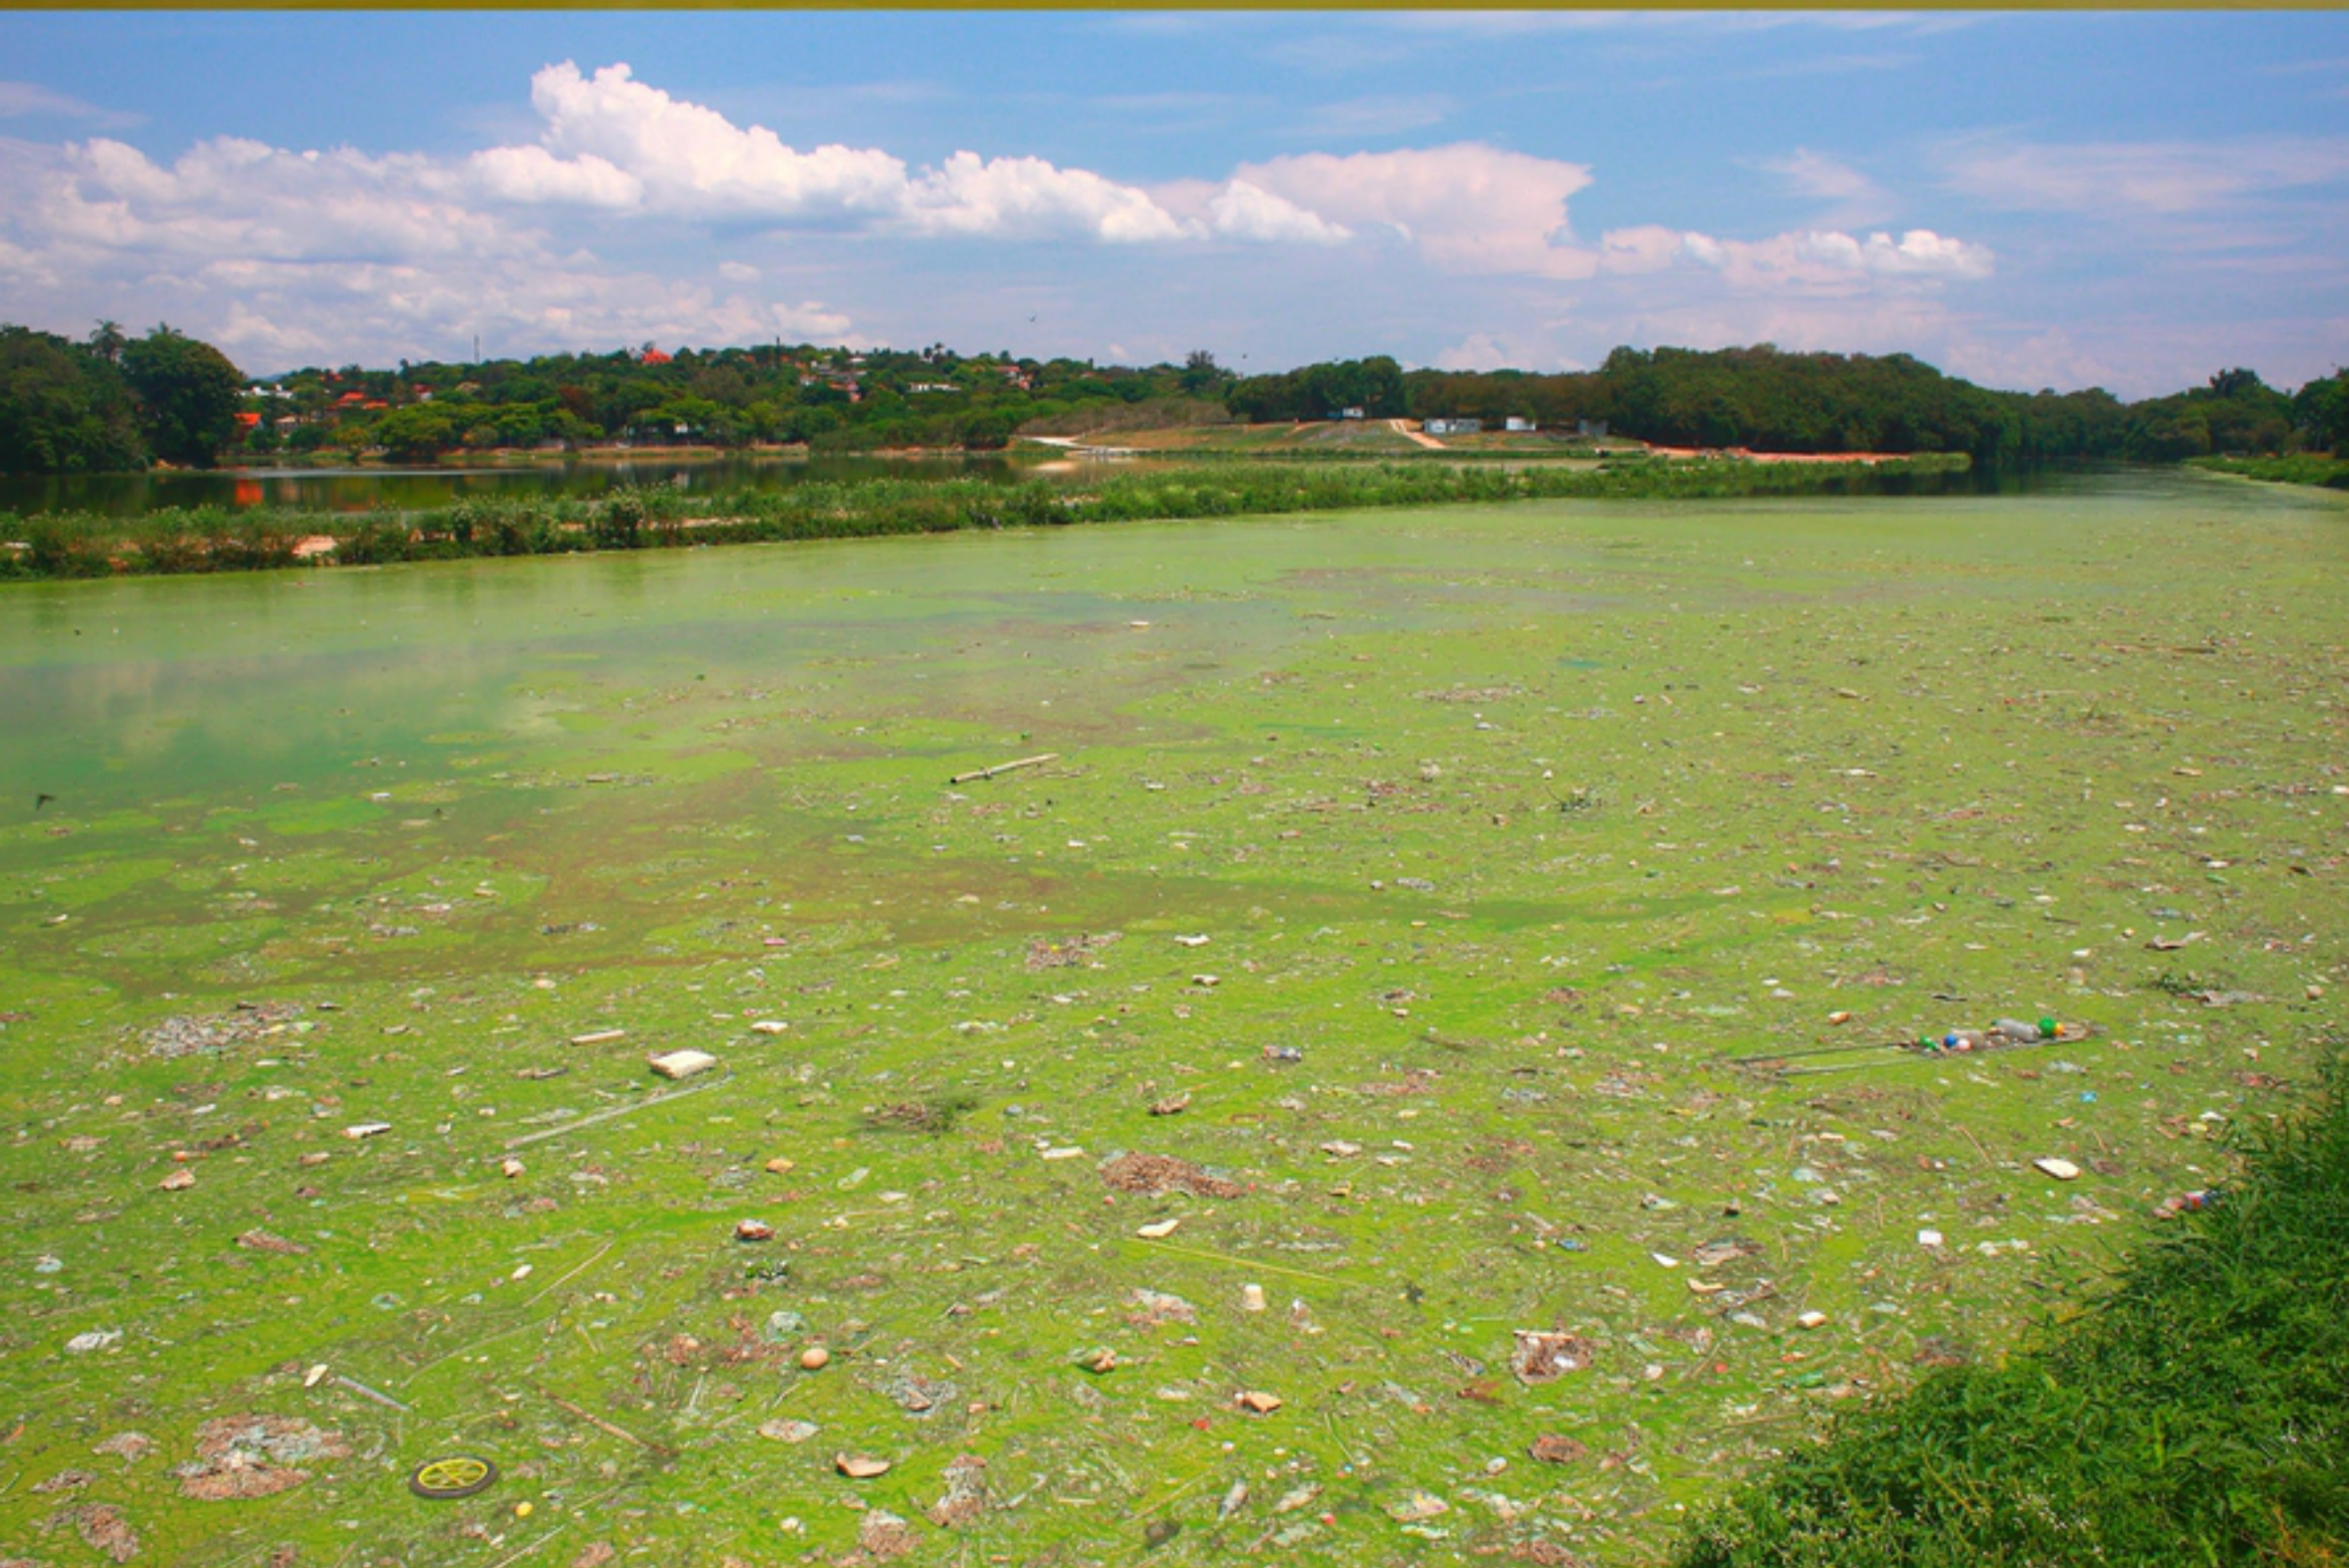

Figure 5
